1 **Quartet Sampling distinguishes lack of support from conflicting support**

2 **in the plant tree of life<sup>1</sup>**

3

4 James B. Pease<sup>2,5</sup>, Joseph W. Brown<sup>3</sup>, Joseph F. Walker<sup>3</sup>, Cody E. Hinchliff<sup>4</sup>, and Stephen A.  
5 Smith<sup>3,5</sup>

6 <sup>2</sup>Department of Biology, Wake Forest University, 455 Vine Street, Winston-Salem, North  
7 Carolina 27101, USA

8 <sup>3</sup>Department of Ecology and Evolutionary Biology, University of Michigan, 830 North  
9 University, Ann Arbor, Michigan 48109, USA

10 <sup>4</sup>Department of Biological Sciences, University of Idaho, 875 Perimeter Drive, MS 3051,  
11 Moscow, Idaho 83844, USA

12 <sup>5</sup>Corresponding Authors: peasejb@wfu.edu, eebsmith@umich.edu

13 **Short Title: Quartet Sampling of discordance in the plant tree of life**

---

<sup>1</sup>Manuscript received \_\_\_\_\_; revision accepted \_\_\_\_\_.

## 14 **ABSTRACT**

15 **Premise of the Study**— Phylogenetic support has been difficult to evaluate within the plant  
16 tree of life partly due to the inability of standard methods to distinguish conflicted versus poorly  
17 informed branches. As phylogenomic and broad-scale datasets continue to grow, support  
18 measures are needed that are more efficient and informative.

19 **Methods**— We describe the Quartet Sampling (QS) method that synthesizes several  
20 phylogenetic and genomic analytical approaches into a quartet-based evaluation system. QS  
21 rapidly characterizes discordance in large-sparse and genome-wide datasets, overcoming issues of  
22 sparse alignment and distinguishing strong conflict from weak support. We test this method with  
23 simulations and recent plant phylogenies inferred from variously sized datasets.

24 **Key Results**— QS scores decrease in variance with increasing replicates and are not strongly  
25 affected by branch depth. Patterns of QS support from different phylogenies leads to a coherent  
26 understanding of ancestral branches defining key disagreements, including *Ginkgo*+cycad,  
27 magnoliids+eudicots (excluding monocots), and mosses+liverworts. The relationships of ANA  
28 grade angiosperms, major monocot groups, and bryophytes and fern families are found to likely  
29 be the result of discordant evolutionary histories, rather than poor information. Also, analyses of  
30 phylogenomic data show QS can detect discordance due to introgression.

31 **Conclusions**— The QS method represents an efficient and effective synthesis of phylogenetic  
32 tests that offer more comprehensive and specific information on branch support than conventional  
33 measures. The QS method corroborates growing evidence that phylogenomic investigations that

34 incorporate discordance testing are warranted to reconstruct the complex evolutionary histories  
35 surrounding in particular ANA grade angiosperms, monocots, and non-vascular plants.

36 **Key words:** bootstrap; branch support; discordance; introgression; lineage sorting;  
37 phylogenetics; phylogenetic methods; phylogenomics; plant tree of life; quartet sampling

## 38 INTRODUCTION

39 Discordance and uncertainty have emerged as a consistent feature throughout the history of our  
40 evolving model of the plant tree of life (Crane, 1985; Chase et al., 1993; Palmer et al., 2004;  
41 Soltis et al., 2011; Wickett et al., 2014). Furthermore, key points of uncertainty and contention  
42 occur at pivotal transitions in the evolution of plant life on earth, such as the development of  
43 vascular tissue (Pryer et al., 2001; Steemans et al., 2009; Banks et al., 2011), the rise of  
44 seed-bearing plants (Chase et al., 1993; Chaw et al., 1997; Bowe et al., 2000; Qiu et al., 2006;  
45 Jiao et al., 2011), and the explosive radiation of flowering plants (Crane, 1985; The Amborella  
46 Genome Project, 2013; Goremykin et al., 2015; Taylor et al., 2015; Simmons, 2016; Edwards  
47 et al., 2016). Modern phylogenomic datasets, rather than quelling these disagreements, have now  
48 repeatedly shown that these phylogenetic conflicts are not only caused by methodological error or  
49 data bias, but also are often the result of genuine biological processes. These forces most  
50 commonly include incomplete lineage sorting (ILS), introgressive hybridization, and paralog  
51 duplication-loss (e.g., Zhong et al., 2013b; Wickett et al., 2014; Zwickl et al., 2014; Yang et al.,  
52 2015; Eaton et al., 2016; Pease et al., 2016b; Goulet et al., 2017; Walker et al., In Press). While  
53 several methods have been proposed to deal with these issues in the context of species tree  
54 inference (e.g., Zwickl and Hillis, 2002; Ogden and Rosenberg, 2006; Shavit Grievink et al.,

55 2010; Aberer et al., 2012; Anderson et al., 2012; Roure et al., 2012; Hinchliff and Roalson, 2013;  
56 Mirarab et al., 2014), we still lack a generalized framework to quantify phylogenetic uncertainty  
57 (specifically branch support) that distinguishes poorly informed branches from the increasingly  
58 common case of multiple strongly supported, but mutually exclusive, phylogenetic histories.  
59 Therefore, the development of systems of phylogenetic evaluation designed to utilize and describe  
60 discordance (rather than minimize or control for it as error) offers strong promise to provide a  
61 more holistic picture of the current state of the plant tree of life.

62 Quantification of branch support for molecular phylogenies has been proposed under many  
63 methods over the last few decades (Felsenstein, 1985; Farris et al., 1996; Larget and Simon, 1999;  
64 Anisimova and Gascuel, 2006; Anisimova et al., 2011; Ronquist et al., 2012; Larget, 2013).  
65 Historically, one of the most commonly used tests has been the non-parametric bootstrap (NBS;  
66 Felsenstein, 1985), which, along with recent variants like the rapid bootstrap (RBS; Stamatakis  
67 et al., 2008), resamples the original data with replacement assuming that aligned sites are  
68 independent and identically distributed (i.i.d.) samples that approximate the true underlying  
69 distribution (Efron, 1992; Felsenstein, 1985). In practice, the assumptions of NBS (in particular  
70 site independence) may rarely be met and can deteriorate under a variety of conditions  
71 (Felsenstein, 1985; Felsenstein and Kishino, 1993; Hillis and Bull, 1993; Sanderson, 1995;  
72 Andrews, 2000; Alfaro, 2003; Cummings et al., 2003). More recently the UltraFast bootstrap  
73 approximation (UFboot) method, utilizing a likelihood-based candidate tree testing, was proposed  
74 to address speed and score interpretation issues for NBS (Minh et al. (2013); and see comparison  
75 in Simmons and Norton (2014)).

76 The other most common branch support metric has been the Bayesian posterior probability  
77 (PP). PP scores are typically calculated from posterior distributions of trees generated using a

78 Markov chain Monte Carlo (MCMC) sampler and then summarized using a majority-rule  
79 consensus tree (e.g, Larget and Simon, 1999; Drummond and Rambaut, 2007; Ronquist et al.,  
80 2012; Larget, 2013). The interpretation of PP values is arguably more straightforward than  
81 bootstrap proportions, as PP values represent the simple probability that a clade exists in the  
82 underlying tree (conditioned on the model of evolution employed, and assuming the data have  
83 evolved in a treelike fashion), and do not involve data resampling. The individual and relative  
84 performance of PP has been well-documented and generally favorable (Wilcox et al., 2002;  
85 Alfaro, 2003; Cummings et al., 2003; Huelsenbeck and Rannala, 2004). However, it has been  
86 recognized that in some scenarios (e.g., oversimplified substitution models) PP may give liberal  
87 support (Suzuki et al., 2002; Douady et al., 2003; Nylander et al., 2004), and there are indications  
88 that PP also may fail under a multi-species coalescent framework with conflicting phylogenies  
89 (e.g., Reid et al., 2013). Some studies have noted the disproportionate effects of a few genes in  
90 tipping the scales in the case of low information in large datasets (Brown and Thomson, 2016;  
91 Shen et al., 2017).

92 Modern phylogenetic datasets being assembled to model the plant tree of life are currently  
93 trending in two directions. Ongoing efforts to expand genetic sampling to as many plant species  
94 as possible have produced increasingly species-rich, but data-sparse, alignments (i.e., large-sparse  
95 matrices). Meanwhile, the accelerating accretion of new genomes and transcriptomes will  
96 continue to deepen genome-wide datasets with millions of aligned sites. Both types of data  
97 present particular challenges to both the tractability and interpretation of phylogenetic branch  
98 support methods. NBS scores are known to perform poorly for large-sparse matrices (Wiens and  
99 Morrill, 2011; Smith et al., 2011; Roure et al., 2012; Hinchliff and Roalson, 2013; Hinchliff and  
100 Smith, 2014b), where the sampling procedure generates uninformative pseudo-replicates that

101 mostly omit informative sites (or consist of mostly missing data). The problem of uninformative  
102 pseudo-replicates also applies to alignment jackknifing used on sparse alignments, where  
103 alignments are sampled without replacement. Therefore, alignment jackknifing also does not  
104 offer a functional solution for large alignments with missing data.

105 Quantifying phylogenetic support from complete datasets brings unique challenges. By  
106 “complete” dataset, we refer to any molecular data that is not a smaller subset of some larger  
107 whole, which means not only whole genomes, but also whole transcriptomes, and even whole  
108 plastid/mitochondrial genomes. PPs provide an appropriate testing framework and  
109 straightforward interpretation, but available Bayesian methods of analysis and computational  
110 speeds do not scale to typical phylogenomic datasets. Resampling methods (including NBS)  
111 gauge how well the resampled dataset replicate the initial result, but complete datasets are not  
112 samples of any larger whole. PP and NBS scores therefore both appear unsuitable for use on large  
113 datasets, the former due to feasibility and the latter due to its assumption (Smith et al., 2009;  
114 Hinchliff and Smith, 2014b).

115 A relatively well-studied, but less frequently applied, family of tests are the likelihood ratio  
116 tests, such as the approximate likelihood ratio test (aLRT), the Shimodaira–Hasegawa [SH]-like  
117 aLRT (SH-aLRT), and the Bayesian-like LRT (bLRT) (Anisimova and Gascuel, 2006; Guindon  
118 et al., 2010; Anisimova et al., 2011). These tests conduct an approximated LRT of the alternative  
119 nearest-neighbor interchange (NNI) moves at each branch of an optimized tree topology.  
120 SH-aLRT has been shown to perform well (Anisimova et al., 2011; Simmons and Norton, 2014;  
121 Simmons and Randle, 2014) and is computationally efficient enough to be run on large datasets in  
122 large part because it does not require generation of multiple topology replicates (as in NBS).  
123 Despite multiple implementations in PhyML and RAxML, and being the default support measure

124 in FastTree, this test has rarely been used in published studies (Guindon et al., 2010; Price et al.,  
125 2010; Stamatakis, 2014).

126 As phylogenomics has developed over the last decade, a variety of methods have been  
127 introduced to factor the increased data and inherent gene tree-species tree conflict. These methods  
128 measure the concordance of gene trees (broadly referring to a phylogeny from any sub-sampled  
129 genomic region), including the internode and tree certainty scores (IC/TC; Rokas et al., 2003;  
130 Salichos et al., 2014; Kobert et al., 2016), Bayesian concordance factors (Ané et al., 2006), and  
131 other concordance measures (Allman et al., 2017). These various certainty scores are developed  
132 around the central concept of a branch support statistic that measures concordance of various  
133 trees with a particular tree hypothesis. This perspective on phylogenetic evaluation offers much in  
134 terms of partitioning phylogenetic discordance and analyzing larger alignments more rapidly in a  
135 phylogenomic coalescent-based framework, but these methods that address discordance using  
136 gene trees may not be as suitable for large-sparse alignments.

137 Finally, quartet methods—in particular quartet puzzling methods—have been examined  
138 extensively in phylogenetics, especially in relation to phylogenetic reconstruction (Strimmer  
139 et al., 1997; Strimmer and von Haeseler, 1997; Ranwez and Gascuel, 2001; Chifman and  
140 Kubatko, 2014; Mirarab et al., 2014). A quartet support method called “reliability values,” which  
141 correlates with NBS values, is calculated as a side effect of the quartet puzzling procedure  
142 (Strimmer et al., 1997; Strimmer and von Haeseler, 1997). More recently, quartet procedures have  
143 been explored to facilitate sampling of large-sparse alignments (Misof et al., 2013) and as part of  
144 coalescent-based quartet inference methods (Gaither and Kubatko, 2016; Sayyari and Mirarab,  
145 2016). These quartet methods benefit not only from the speed advantages of a smaller alignment,  
146 but also from the statistical consistency of quartet trees, which avoid complex lineage sorting

147 issues that occur with more speciose phylogenies (Rosenberg, 2002; Degnan and Salter, 2005).

148 Few measures of support (except concordance methods) explicitly operate with the  
149 expectation of multiple histories, or fail to distinguish different causes of poor support for a  
150 branch in the phylogeny. In practice, this means when a phylogenetic relationship shows poor  
151 support under NBS or PP, the specific cause is not apparent since these tests do not distinguish  
152 between the case of multiple supported-but-conflicting phylogenetic relationships and the case of  
153 simply low information. Being able to distinguish among these causes of low phylogenetic  
154 support and to identify branches that have a strong consensus and a strong secondary evolutionary  
155 history would provide valuable insight into the plant tree of life (among others; and see also  
156 Brown and Lemmon, 2007).

157 Here, we describe the Quartet Sampling (QS) method (Fig. 1 and Table 1), which blends  
158 aspects from many of the evaluation methods described above and leverages the efficiency of  
159 quartet-based evaluation. The goal of the QS method is to evaluate phylogenies (particularly  
160 large-sparse and genome-wide) by dissecting phylogenetic discordance to distinguish among (1)  
161 differences in phylogenetic branch support due to lack of information (the general goal of  
162 bootstrap or Bayesian posteriors), (2) poor support due to discordance as a result of lineage  
163 sorting or introgression (as in concordance measures), and (3) low support due to particular taxa  
164 with poor or conflicted information (i.e., “rogue taxa”; Wilkinson, 1996; Aberer et al., 2012).  
165 These various causes of discordance are frequently surveyed separately in many modern  
166 phylogenetic and particularly phylogenomic studies (e.g., Xi et al., 2014a; Wickett et al., 2014;  
167 Yang et al., 2015; Pease et al., 2016b; Walker et al., In Press), but the QS method provides a  
168 unified method for their execution, interpretation, and reporting. Additionally, the QS method  
169 offers a viable means to describe branch support in large phylogenies built from sparse



170 alignments (10,000–30,000 tips with >80% missing data), datasets for which Bayesian analyses  
171 are simply not tractable. We also describe how QS enhances analysis of both genome-wide  
172 datasets and smaller-scale multi-gene data sets conventionally used in systematics.

173 In this study, we will (1) describe the features, parameters, and interpretation of the QS  
174 method, (2) validate the QS method with simulations that demonstrate its effectiveness, and (3)  
175 evaluate and discuss the plant tree of life by testing the QS method on recently published  
176 large-sparse and phylogenomic datasets at timescales spanning from Viridiplantae to sub-generic  
177 clades. The goal of the re-analysis of these phylogenies is not to compare the methods of tree  
178 inference or dataset composition, but instead to use the QS method to collectively analyze these  
179 data as a diverse set of alternative phylogenetic hypotheses of the plant trees of life. We show  
180 consistently through these datasets that the QS method acts as a more conservative test of branch  
181 support that provides greater discrimination between highly supported and poorly supported  
182 branches than other support measures. We also show that the QS method can identify branches in  
183 a phylogeny where biological conflict is likely occurring, which can inform targeting of more  
184 detailed investigations within a clade. Finally, we show several cases where low support for the  
185 given phylogenetic relationship and strong counter-support for an alternative relationship together  
186 indicate a coherent consensus. In other cases, QS specifically indicate the likely presence of  
187 alternative phylogenetic histories, as distinct from low branch support. We hope this study  
188 encourages additional discussion, testing, and innovation of new phylogenetic evaluation  
189 methods. We also hope it contributes to the broader discussion about moving the plant tree of life  
190 beyond the increasingly difficult goal of resolving a single unified ‘Species Tree’ (Hahn and  
191 Nakhleh, 2015; Smith et al., 2015), and into a future where the complex “multiverse” of  
192 phylogenetic relationships that is manifest throughout the plant tree of life are more fully

193 explored and appreciated.

## 194 **MATERIALS AND METHODS**

195 *Quartet Sampling*— The Quartet Sampling (QS) procedure outlined here was inspired by  
196 aspects from several quartet-based and concordance methods, most particularly the process  
197 originally outlined by Hinchliff and Smith (2014b). The QS method takes an existing  
198 phylogenetic topology (which can be inferred by any method) and a molecular dataset (not  
199 necessarily the one that generated the phylogeny) and separately evaluates one or more internal  
200 branches on the given phylogeny. The QS method (Fig. 1) was designed to rapidly and  
201 simultaneously assess the confidence, consistency, and informativeness of internal tree  
202 relationships, concurrent with an analysis of the reliability of each terminal branch.

203 For a given phylogeny, each observed internal tree branch partitions the tree into four  
204 non-overlapping subsets of taxa (Fig. 1A). These four sets of taxa can exist in three possible  
205 relationships: the concordant relationship that matches the configuration in the given topology  
206 and two alternative discordant configurations. The QS method repeatedly and randomly samples  
207 one taxon from each of the four subsets and then evaluates the likelihood all three possible  
208 phylogenies given the sequence data for the randomly selected quartet spanning that particular  
209 branch.

210 For each quartet sampled for the focal branch, the likelihood is evaluated (using RAxML or  
211 PAUP\*; Stamatakis, 2014; Swofford and Sullivan, 2003) for all three possible topologies that  
212 these four sampled taxa can take. The quartet topology with the best likelihood is then recorded  
213 and tabulated across all replicates, generating a set of counts (across all replicates per branch) for

214 the concordant and each of the two discordant relationships. If a minimum alignment overlap is  
215 specified, then quartets must contain the minimum number of overlapping non-empty sites for all  
216 four taxa to be considered suitable for any calculations. Additionally, a parameter of a minimum  
217 likelihood differential may be set. If the most-likely topology (of the three) does not exceed the  
218 likelihood of the second-most-likely phylogeny by the set threshold then the quartet is considered  
219 “uninformative” and tabulated separately. Therefore, for a given internal branch, the QS method  
220 generates counts of the three possible topologies (and uninformative replicates) sampled from  
221 different quartets of taxa spanning the particular branch.

222 The QS method uses these resampled quartet tree counts to calculate three scores for each  
223 internal branch of the focal tree (Fig. 1B, Table 1, and Appendix S1; see Supplemental Data with  
224 this article). The QC (Quartet Concordance) score is an entropy-like measure (similar to the ICA  
225 score; Salichos et al. 2014) that quantifies the relative support among the three possible  
226 resolutions of four taxa. When the most commonly sampled topology is concordant with the input  
227 tree, then the QC takes positive values in the range (0,1]. Thus, QC=1 when all quartet trees are  
228 concordant with the focal branch. When one of the discordant topologies is the most commonly  
229 resampled quartet, QC takes negative values in the range [-1,0), approaching -1 when all quartet  
230 trees are one of the two discordant phylogenies. When support is evenly split among the three  
231 alternative topologies (or two if only two of the three possible are sampled), QC equals 0.

232 The QD (Quartet Differential) score uses the logic of the  $f$ - and  $D$ -statistics for introgression  
233 (Reich et al., 2009; Green et al., 2010; Durand et al., 2011; Pease and Hahn, 2015) and measures  
234 the disparity between the sampled proportions of the two discordant topologies (though with gene  
235 tree proportions, rather than site frequencies). The QD score does not specifically quantify  
236 introgression nor identify introgressing taxa, but does indicate that one alternative relationship is

237 sampled more often than the other. High values of QD report that there is one clearly preferred  
238 topology among the two discordant topologies, a potential indication of a biased biological  
239 process beyond background lineage sorting on the given branch, including introgression, strong  
240 rate heterogeneity, heterogeneous base compositions, etc. QD varies in the range [0,1] with a  
241 value of 0, meaning no skew in the proportions of discordant trees, and the extreme value of 1,  
242 which means all discordant trees sampled are only from one of the two possible alternative  
243 relationships.

244 The QU score (Quartet Uncertainty) quantifies the overall proportion of quartets for a given  
245 branch where the tree with the best likelihood value has a likelihood that is not higher than the  
246 next most likely tree by a given differential cutoff. This ensures that replicates are not counted as  
247 being concordant or discordant when the molecular data itself is effectively equivocal on the  
248 topology by all three options having nearly indistinguishable likelihood scores. QU is measured  
249 in the range [0,1], which indicates the proportion of sampled quartets that did not exceed of the  
250 cutoff. A QU of 0 means no “uncertain” quartets (i.e., highly informative data), while a value of 1  
251 indicates 100% of quartets were uncertain (i.e., no information for the given branch). QU reports  
252 the informativeness of the branch, which in conjunction with QD and QC distinguishes between  
253 branches that have low information versus those with conflicting information (i.e., high  
254 discordance).

255 Finally, for each terminal taxon, a QF (Quartet Fidelity) score is calculated to report what  
256 proportion of the time inclusion of a given taxon in a quartet (across all branches) results in a  
257 discordant quartet topology. QF is therefore similar in approach to a “rogue taxon” test  
258 (Wilkinson, 1996; Aberer et al., 2012). For a given taxon, the QF score is measured in the range  
259 [0,1] as the proportion of quartet topologies involving the taxon that are concordant with the focal

260 tree branch. Therefore,  $QF=1$  indicates a given taxon always produces concordant topologies  
261 when used in a quartet replicate.  $QF$  values approaching zero indicate mostly discordant  
262 topologies involving this taxon, and may indicate poor sequence quality or identity, a  
263 lineage-specific process that is distorting the phylogeny, or that the taxon is significantly  
264 misplaced in the given tree. Note that  $QF$  differs specifically from  $QC/QD/QU$  by being a  
265 taxon-specific test across internal branch tests rather than a branch-specific test.

266 Collectively, these four tests represent a means to distinguish the consistency of a branch  
267 ( $QC$ ), the presence of a secondary evolutionary history ( $QD$ ), the amount of information  
268 regarding a branch ( $QU$ ), and the reliability of individual taxa in the tree ( $QF$ ; Fig. 1B and see  
269 Table 1). Taken together these tests provide a means to disentangle these effects rather than have  
270 them conflated under a summary score as in standard measures of phylogenetic support. For a full  
271 technical description of the  $QS$  method, see Appendix S1.

272 ***Guidelines for implementation of QS***— We implemented the above procedure in Python in  
273 a program `quartetsampling` that samples an alignment randomly to generate many  
274 representative quartet topology replicates for each internal branch in a corresponding focal tree  
275 (<https://github.com/fephyfofum/quartetsampling>). This procedure has a number of advantages  
276 over NBS for larger datasets. First, alignment columns are not resampled (as in NBS and RBS),  
277 which allows even very sparse alignments to be used. Second, the number of likelihood  
278 calculations that are required is the number of internal branches in the tree multiplied by the  
279 number of replicates per branch multiplied by three possible topologies. Since computation time  
280 scales linearly with the number of taxa, individual replicates are fast, and the computations can be  
281 readily parallelized across processors and furthermore discretized across systems (with results

282 combined later). This allows QS to be efficiently applied to large alignments beyond the practical  
283 limits of NBS and PP. The most extensive computational time was for the Zanne et al. (2014b)  
284 31,749 taxon dataset (see below), which we ran on the Wake Forest University DEAC  
285 high-performance cluster using 8 nodes with 16 CPU each. This analysis completed 200  
286 replicates for the full tree in 13 hours. Smaller genome-wide datasets finished 1000 gene-tree  
287 replicates on quad-core desktops approximately 12 hours, and conventional multi-gene datasets  
288 took only a few minutes to a few hours to run on a standard desktop.

289 Although the SH-aLRT was by far the fastest method we consider here, the QS was fast  
290 enough for large scale analyses. QS can also be applied separately to only a few branches,  
291 allowing for more thorough exploration of particular branches of interest. Furthermore, the QS  
292 does not require the tree tested to be the maximum likelihood topology, a requirement for  
293 SH-aLRT. For our simulated data, we found that performing 200 QS replicates per branch was  
294 adequate to achieve low variance in QS score. As would be expected, more replicates per branch  
295 should generally be used for larger trees to sample a greater fraction of the total possible quartets.

296 Furthermore, some branches, especially in large trees, may be entirely unsupported by the  
297 alignment due to a lack of sampling overlap among appropriate taxa (i.e., no sites in the  
298 alignment contain data from each of the four subsets of taxa; Fig. 1A). Therefore, no  
299 phylogenetic information exists to inform the branch (i.e., are “indecisive” *sensu* Steel and  
300 Sanderson, 2010), and the QS procedure identifies these branches rather than discarding them or  
301 marking them as simply low support.

302 ***Guidelines for interpretation of QS support values***— An important consideration with any  
303 measure used to ascertain confidence is the precise interpretation. In order to facilitate accurate

304 interpretation of the QS scores, we provide a concise visual description of the tests (Fig. 1) and a  
305 table describing example scores and their interpretations (Table 1). Particularly notable as shown  
306 in Table 1 and in the results, the QS method can not only “support” or “fail to support” a given  
307 branch hypothesis, but also can offer “counter-support” for an alternative branch (as in the  
308 IC/ICA scores; Salichos et al., 2014; Kobert et al., 2016). Therefore, even “inaccurate” branch  
309 hypotheses can offer information in the form strength of the “counter-support” for an alternative  
310 quartet topology (i.e., the degree of negativity of the QC score; for examples see Fig. 6).

311 The QS scores we have described calculate the sensitivity of the resolution of a particular  
312 branch to different combinations of taxa sampled around that branch. Each QS replicate  
313 calculates whether the four sampled taxa support the resolution of the branch found in the tree  
314 over the alternative resolutions. This framework is similar to the interpretation made by those  
315 using taxon jackknife analyses for outgroup sensitivity (e.g., Edwards et al., 2005) and the IC  
316 score when used with incomplete trees (Kobert et al., 2016). We argue that this interpretation is  
317 richer in information than the NBS, and in our simulations the QC score also appears to more  
318 conservatively and accurately assign high support values to branches that are present in the true  
319 tree (i.e., relatively low false positive rates, at least when the likelihood threshold is small, i.e., in  
320 the range of  $\sim 2$  used here; Appendix S2). QC scores are particularly helpful in terms of clarifying  
321 strength of support for branches with concordant tree frequencies not close to 1 (Appendix S3).

322 ***Generation and evaluation of simulated phylogenies***— We first tested the method by  
323 generating simulated phylogenies under the pure birth (birth = 1) model of evolution with 50,  
324 100, and 500 tips using `pxbdsim` from the `phyx` toolkit (Brown et al., 2017). Using these trees,  
325 we generated 1000 bp alignments (no indels) under the Jukes-Cantor model with INDELible v.

326 1.03 (Fletcher and Yang, 2009). Trees were scaled so that the average branch lengths were about  
327 0.2, based on the observation that this generated reasonable trees with most branches recovered  
328 correctly from ML analyses. Using the same procedure, we also simulated trees with 500 tips and  
329 associated alignments with ten nucleotide partitions, each with 500 sites under the Jukes-Cantor  
330 model. We simulated both the full alignment with partitions and a modified randomly resampled  
331 sparse alignment to examine the behavior of QS in the presence of missing data (see Appendix S1  
332 for details). These partitioned and sparse alignments had the same qualitative features as the full  
333 alignment.

334 Unlike the NBS method, which generates a set of trees from which branch support is  
335 estimated, the QS method requires only a single input topology for which branch support will be  
336 measured. We calculated QC, QD, QU, and QF scores for the true underlying tree as well as the  
337 ML tree generated by RAxML, but we focus on results for the ML tree. To examine how the  
338 number of replicates impacts the QS precision, we conducted simulations varying the number of  
339 replicates for randomly drawn branches in the simulated trees (Fig. 2A; Appendix S4). Based on  
340 these simulations, we elected to use 200 replicates per branch, since the variation in the QC score  
341 was generally low across all tree sizes when this many replicates were performed. We used  
342 RAxML and PAUP\* to estimate the ML for the three alternative topologies for each QS replicate  
343 (using the  $-f N$  option and the GTRGAMMA model in RAxML). We also calculated  
344 branch-specific QC/QD/QU and taxon-specific QF scores using likelihood differential cutoffs of  
345  $\Delta L = 0$  (no filtering) and  $\Delta L = 2.0$ , which requires stronger conflicting signal to interpret  
346 branches in the input tree as unsupported.



347 **Testing of Empirical Datasets**— While the simulations show the general reliability of the  
348 method, our primary goal was to use this test to holistically evaluate recent large-scale plant  
349 phylogenies, and also to show the utility and versatility of this method in subgroup and even  
350 sub-genera analyses. Using published phylogenies and public datasets, we evaluated five recent  
351 large-scale phylogenies, including (1) an 103-transcriptome dataset spanning Viridiplantae from  
352 Wickett et al. (2014, abbreviated hereafter as WI2014), (2) two large-sparse phylogenies spanning  
353 land plants from Hinchliff and Smith (2014b, abbreviated HS2014) and Zanne et al. (2014b,  
354 abbreviated ZN2014), and (3) phylogenies spanning Magnoliophyta (angiosperms) with hundreds  
355 of genes from Xi et al. (2014a, abbreviated XI2014) and Cannon et al. (2015b, abbreviated  
356 CN2015). Additionally, to demonstrate the utility of this method at medium and short time scales,  
357 we evaluated two whole transcriptome datasets from the wild tomato clade *Solanum* sect.  
358 *Lycopersicon* from Pease et al. (2016b, abbreviated PE2016) and carnivorous plants from the  
359 order Caryophyllales from Walker et al. (In Press, abbreviated WA2017). Finally, we tested this  
360 method on a more typical medium-sized multi-locus dataset from Polypodopsida (ferns) from  
361 Pryer et al. (2016b, abbreviated PR2016), such as might appear in many phylogenetic studies of  
362 large subgroups. Data for these studies were obtained from datadryad.org and iplant.org  
363 (Hinchliff and Smith, 2014a; Matasci et al., 2014; Xi et al., 2014b; Zanne et al., 2014a; Cannon  
364 et al., 2015a; Pease et al., 2016a; Pryer et al., 2016a; Walker et al., 2017).

365 In addition, we analyzed the datasets using 200 individual gene trees for XI2014 and  
366 WA2017, and 1000 gene trees for PE2016 and WI2014. For these datasets, quartets are sampled  
367 as usual, but only the individual gene sequence alignments are assessed. These phylogenies were  
368 all evaluated using a minimum alignment overlap per quartet of 100 bp and a minimum likelihood  
369 differential of 2 (i.e., the optimal tree's log-likelihood must exceed the second-most likely tree by

370 a value of at least 2). We also calculated the phylogenies with and without partitioning in  
371 RAxML, but in all cases the partitioned datasets did not qualitatively differ from the results of the  
372 unpartitioned datasets. These data are provided as supplementary data, but are not shown here.

373 We also either re-calculated other measures of branch support or used values from the  
374 published studies for comparison to the QS method for each phylogeny, except HS2014 and  
375 ZN2014 where the size and sparseness of the datasets prohibited the calculation of other measures  
376 of support. For the datasets from CN2015, PR2016, WA2017, and XI2014 100 replicates each of  
377 RAxML NBS and SH-test were performed. Additionally, PP scores for PR2016 were calculated  
378 using MrBayes (Ronquist and Huelsenbeck, 2003; Ronquist et al., 2012), and IC scores for  
379 calculated for Walker et al. (In Press). For PE2016 and WI2014, RAxML NBS, MP-EST, or IC  
380 scores were taken from published values.

## 381 **RESULTS AND DISCUSSION**

382 *Analysis of simulated and empirical datasets shows that QS components are consistent,*  
383 *convergent, and complementary*— In order to examine the consistency and reliability of the  
384 Quartet Sampling method, we first tested QS on a set of simulated phylogenies. As expected, the  
385 QC score was generally correlated in a sigmoid fashion with the frequency of concordant trees  
386 (Appendix S5). In order to determine the appropriate number of testing replicates and  
387 demonstrate convergence, we conducted an analysis of the variance of the QS score by running  
388 the QS analysis 100 times on randomly selected branches with different numbers of per-branch  
389 replicates for trees with 50, 100, and 500 taxa. This analysis showed that the QC scores converge  
390 (with decreasing variance as expected) on a consistent mean value for each branch as the number

391 of replicates increased (Fig. 2A). Sampling 200 quartets per branch reduced the variance to less  
392 than 0.003 in all cases. Similar patterns of convergence were also found for QD values, though  
393 with high variance (Appendix S5). We also note that since QS is a branch-specific test (not a  
394 tree-wide test), key branches of interest can be tested individually at much higher numbers of  
395 replicates without the need to re-test the entire tree.

396 QC and QD both incorporate the frequencies of discordant quartets in different ways, but for  
397 that same reason run the risk of redundancy. However, we observed in the Hinchliff and Smith  
398 (2014b) dataset (abbreviated as HS2014) that QD can take on a range of values for QC (Appendix  
399 S5). As QC goes to the limits of its range (-1,1), QD values tend to have more extreme values.  
400 These extreme values for QD were either due to a lack of discordant trees that limits sampling  
401 (when QC approaches 1) or a high amount of one discordant tree (when QC approaches -1). This  
402 made QC and QD related, but not strictly correlated, measures. Overall, the mean QC for the  
403 HS2014 (0.15; interquartile range (IQR) = [-0.13, 0.46]) and Zanne et al. (2014b) (abbreviated  
404 ZN2014; 0.17; IQR = [-0.10, 0.63]) were low compared to the less speciose phylogenies (Fig.  
405 2B; Appendix S5). Applying a minimum log-likelihood differential threshold to small trees  
406 tended to push scores toward extremes, resulting in more 0s and 1s (Appendix S2). As expected,  
407 given the sparsity of the matrices for ZN2014 and HS2014, the proportion of uninformative  
408 quartets was high in both cases (mean QU of 0.65 and 0.85, respectively).

409 Notably, QS found that 33.4% and 29.8% of branches in HS2014 and ZN2014, respectively,  
410 had QC values less than -0.05. This meant that about a third of the branches in these consensus  
411 phylogenies reported not just “low support” for the given branch, went further to report  
412 “counter-support” for one of the two alternative topological arrangements at that branch (see  
413 Table 1). Many empirical cases have been documented where one anomalous lineage can distort

414 not only its own phylogenetic placement, but can exert a wide-ranging set of distortions on the  
415 topology (e.g., Fig. 8A, among many others). Resampling methods that infer a complete set of  
416 tips (like NBS) will produce replicates that may also be distorted and thus firmly support these  
417 relationships rather than highlight this discordance. Therefore, as pointed out by many other  
418 quartet methods (Mirarab et al., 2014; Sayyari and Mirarab, 2016), the use of quartets breaks  
419 down the problem in more manageable units that cannot be distorted by these complex lineage  
420 sorting effects.

421 ***QS indicates strong relationships within, but not among, major land plant lineages—*** While  
422 simulations and general characterizations of the QS method are necessary to demonstrate its  
423 effectiveness, the primary goal of this study was to use QS to reanalyze and compare several  
424 recent speciose and phylogenomic datasets to address ongoing debates of phylogenetic  
425 relationships in the plant tree of life. We used QS methods to evaluate two of the most speciose  
426 phylogenies of land plants presently assembled by Hinchliff and Smith (2014b) and Zanne et al.  
427 (2014b), and one of the most comprehensive phylogenies of Viridiplantae from Wickett et al.  
428 (2014) (abbreviated as WI2014). HS2014 spanned 13,093 taxa with a total alignment of 148,143  
429 sites (Fig. 3), but extremely sparse overall coverage (96.4% missing characters). The alignment  
430 used for ZN2014 (Fig. 4) contained 31,749 taxa and an alignment length of 12,632 bp, but also  
431 with sparse coverage (82.3% missing characters). However, the QS method accommodates large,  
432 sparse matrices, by evaluating alignment overlap only for each replicate quartet without requiring  
433 complete occupancy for any partition of the alignment. Finally, the WI2014 (Fig. 5) contains only  
434 80 taxa, but, as the pilot study for the 1000 Plants Project (1KP), spans the deepest time scale of  
435 these three (including Chlorophyta) and had a highly occupied alignment of 290,718 bp with only

436 10.7% missing data.

437 Most major plant groups showed strong support in HS2014 and ZN2014, including  
438 angiosperms (QC=0.68 and 0.75, respectively), Anthocerotophyta (hornworts; QC=0.54,0.92),  
439 Acrogymnospermae (gymnosperms; QC=0.37,0.32), and Polypodopsida (ferns; QC=0.23,0.46).  
440 Marchantiophyta (liverworts), rosids, and asterids all showed low support in HC2014 (QC<0.2).  
441 Monocots (both including and excluding *Acorus*) had poor support in both HS2014 and ZN2014  
442 ( $-0.05 < QC < 0.05$ ). In WI2014, all the major groups (i.e., labeled internal branches in Fig. 5)  
443 showed high support. In contrast to the generally high support for these major established groups,  
444 we frequently found low support on the “backbone” relationships among these groups, in a  
445 manner consistent with most previous phylogenies of land plants.

446 The relationships among Marchantiophyta, Bryophyta (mosses), Anthocerotophyta,  
447 lycophytes, and “euphyllophytes” (i.e., ferns and seed-bearing plants) has also been under  
448 substantial ongoing debate (Shaw et al., 2011). HS2014 places mosses as sister to the remaining  
449 land plants, followed successively by liverworts, hornworts, and lycophytes. However, HS2014  
450 indicates QC=-0.04 for a branch defining liverworts + all other land plants the exclusion of  
451 mosses (Figs. 3B, 6A), indicating that the most common quartet branch among the replicates was  
452 not the branch shown in the tree. By contrast WI2014 shows strong support (QC=0.67) for the  
453 branch leading to a moss+liverwort common ancestor (Fig. 5). While ZN2014 contains only  
454 embryophytes, it shows weak support (QC=0.15) for the branch separating moss+liverwort from  
455 the rest of land plants. WI2014 has hornworts (represented by two *Nothoceros*) as sister to a clade  
456 of mosses and liverworts+tracheophytes (as in Renzaglia et al., 2000), with high support for all  
457 relationships. However, note that WI2014 showed substantial counter-support against a common  
458 mosses+liverworts+tracheophyte ancestor to the exclusion of hornworts. Coalescent analyses in

459 WI2014 also support this finding of a monophyletic Bryophyta+Marchantiophyta clade.  
460 Therefore, while the topology of HS2014 was consistent with the order of many previous  
461 phylogenies (Nickrent et al., 2000; Qiu et al., 2006; Chang and Graham, 2011), QS supported the  
462 alternative configuration of mosses and liverworts as sister groups (as in WI2014 and ZN2014;  
463 see also Zhong et al., 2013a).

464 In all three datasets, the monophyly of vascular plants was strongly maintained, despite the  
465 inclusion of *Selaginella* that have unusual GC content (Banks et al., 2011). However, the branch  
466 leading to *Selaginella* often was accompanied by a higher QD value, which could be a result of  
467 the biased composition or indication of a secondary evolutionary history. The QF value for  
468 *Selaginella* in all cases was moderate, indicating that overall it did not more often produce  
469 discordant topologies compared to other lineages. We also observed substantial discordance and  
470 counter-support for relationships tested among various bryophyte groups and key taxa in HS2014,  
471 possibly indicative of substantially under-appreciated hybridization among mosses (Nylander  
472 et al., 2004). The collective results indicated a (perhaps complicated) monophyly of liverworts  
473 and mosses, inconsistent placement of hornworts, and strong support for tracheophytes.

474 ***QS analysis of ferns confirms close relationship to seed plants and shows QS is effective on***  
475 ***smaller datasets***— Another notable similarity of both HS2014 and ZN2014 was the poor score  
476 at the base of “euphyllophytes” that placed ferns in a clade with seed plants. QC scores on this  
477 branch were near zero in HS2104 and ZN2014 (0.02 and -0.06, respectively) and relatively low  
478 for the WI2014 tree (QC=0.33); QD values were also relatively large (0.44–1). Within ferns the  
479 arrangement of major clades in ZN2014 (Fig. 4E) was mostly consistent with the recently  
480 published phylogeny by The Pteridophyte Phylogeny Group (PPG I, 2016). Those clades whose

481 relationships were counter-supported (Marratiales, Salviniiales, Hymenophyllales) were  
482 discordant with the PPG I consensus and other recent phylogenies (Pryer et al., 2004; Testo and  
483 Sundue, 2016) demonstrating the utility of QS in highlighting suspect relationships. Some key  
484 areas of known high uncertainty (e.g., *Saccoloma* and *Lindsaea*) were highlighted with low and  
485 negative QC scores. Additionally, the debated position of *Equisetum* was also reflected by low  
486 scores.

487 While QS was designed for large datasets, we also found that QS can perform well on smaller  
488 multi-gene datasets conventionally used for systematics studies. Using the phylogeny and data  
489 from Pryer et al. (2016b), we reanalyzed the 5778 bp alignment using QS, NBS, SH, and PP  
490 scores (Fig. 7). The QS scores were more conservative, but confirmed the conclusions of Pryer  
491 et al. (2016b) regarding the monophyly of maidenhair ferns (*Adiantum*) and its placement in a  
492 clade with the Vittarioids. In terms of QC/QD/QU scores, ZN2014 also supported the monophyly  
493 of *Adiantum* (0.11/0/0.83; 14 taxa), the Vittarioids (0.20/1/0.71; 8 taxa), and their common  
494 ancestor (0.22/1/0.87). We also found that among different branches in PR2016 with fairly similar  
495 NBS and PP values, QS offers a wide range of support values (including negative-QC  
496 counter-support).

497 ***Gymnosperms are monophyletic under QS and support Ginkgo in a clade with cycads—***

498 Another question that has attracted substantial debate is the relationships among the major  
499 gymnosperm lineages and angiosperms. Under QS evaluation, HS2014, ZN2014, XI2014, and  
500 WI2014 all indicate strong support for monophyly of recognized gymnosperm lineages. However,  
501 the relationships among cone-bearing lineages differ among these four phylogenies. ZN2014 and  
502 WI2014 place *Ginkgo* in a clade with cycads (consistent with Qiu et al., 2006; Bowe et al., 2000;

503 Lee et al., 2011; Xi et al., 2013, ; Fig. 6B). While the HS2014 topology places cycads as sister to  
504 the remaining gymnosperms (i.e., not monophyletic with *Ginkgo*), the QS evaluation  
505 counter-supports this relationship. Therefore, even though HS2014/WI2014 and ZN2014 had  
506 different topological arrangements of these taxa, the QS analyses of these datasets indicates a  
507 consistent message of a *Ginkgo*+cycads clade separate from the rest of gymnosperms.

508 This pattern of disagreement in topology but consistent QS interpretation was observed again  
509 in the placement of Gnetales relative to the conifer lineages (Fig. 6C). ZN2014 indicates Gnetales  
510 in a clade with a monophyletic Pinales (consistent with Lee et al. 2011) whereas HS2014 and  
511 WI2014 show a Gnetales+Pinaceae ancestor distinct from other conifers (i.e., the “Gnepine”  
512 hypothesis; Bowe et al., 2000; Xi et al., 2013). However, again the HS2014 and WI2014 QS  
513 scores offer counter-support against the “Gnepine” relationship (QC=-0.19 and -0.67,  
514 respectively) and show that one alternative was strongly preferred (QD=0.5 and 0.1). Here again,  
515 in evaluating different competing topologies the QS method can offer consistent interpretations  
516 that in this case indicates the monophyly of Pinales, but perhaps also offer some (albeit weak)  
517 evidence that warrants further examination of possible gene flow between Gnetales and Pinales.

518 Finally, among the non-Pinaceae conifers, we observed conflicting patterns of poor backbone  
519 support for monophyletic clades. In both ZN2014 and HS2014, *Amentotaxus* and *Torreya* form a  
520 clade with the rest of Taxaceae to the exclusion of *Cephalotaxus*. Relationships between these  
521 three Taxaceae lineages are both strongly counter-supported by QS. The high values of QD  
522 (0.56–0.8) offer indication of possible introgression among these lineages. Therefore, again QS  
523 scores highlight a part of the phylogenetic tree that may be mis-modeled by these consensus  
524 phylogenies.



525 *Quartet Sampling indicates biased conflict among the ANA grade angiosperms*— Few  
526 issues in angiosperm evolution have garnered more recent debate than the relationship among the  
527 so-called “ANA grade” angiosperms, which include *Amborella*, Nymphaeales, and  
528 Austrobaileyales. Of the four datasets where this phylogenetic relationship was testable, only  
529 WI2014 inferred the “*Amborella*-first” hypothesis (Figs. 5, 6D; Qiu et al., 1999; Stefanović et al.,  
530 2004; Qiu et al., 2006; Moore et al., 2007; Soltis et al., 2011; The Amborella Genome Project,  
531 2013). ZN2014 shows a “Nymphaeales-first” relationship (Fig. 4B), and HS2014 and XI2014  
532 indicate “*Amborella*+Nymphaeales”-first (Fig. 3B; Appendix S6). Regardless of the resolution  
533 inferred in the consensus phylogenies from each dataset, the branches surrounding the  
534 ANA-grade were all counter-supported ( $QC < 0$ ) and biased in their discordance ( $QD > 0.8$ ; Fig.  
535 6D). ZN2014 offers weak support for *Amborella*+Nymphaeales, while XI2014 counter-supports  
536 this relationship. In HS2014, WI2014, and ZN2014, the scores on the branch that placed  
537 Austrobaileyales as the closest relative group to the remainder of angiosperms were strongly  
538 QC-counter-supported and QD-biased.

539 Two questions surround the relationships of the ANA grade angiosperms. First, what was the  
540 relationship among these lineages? Second, are the longstanding disagreements in inference of  
541 these relationships the result of genuine biological conflict (i.e., introgression, horizontal transfer,  
542 etc.), limitations in the data, or a methodological artifact arising from the depth of this branch, the  
543 monotypic status of *Amborella*, and/or the rapidity of the angiosperm radiation? On the first  
544 question, QS lacks support for “Nymphaeales-first”. Whether there more support exists for  
545 *Amborella*+Nymphaeales or “*Amborella*-first” (as found also by The Amborella Genome Project,  
546 2013) is unclear. The results we present suggest that both relationships have support in the data,  
547 depending on changes in the dataset composition (as also found by Wickett et al. 2014).

548 On the second question, however, the strong QD values indicate a biased conflict that suggests  
549 a secondary evolutionary history conflicting with the primary tree in a way that has so far evaded  
550 comprehensive characterization. Demonstrations that bryophyte mitochondrial sequences are  
551 present in *Amborella* (Rice et al., 2013; Taylor et al., 2015) indicate that these lineages have  
552 experienced ancient introgressive events that might create competing evolutionary narratives in  
553 the manner indicated by the QS results shown here (and see also Shen et al., 2017). Given the  
554 intensity of effort to address these relationships without a broad community consensus and the  
555 specific evidence of long-range introgression in *Amborella*, a greater understanding of  
556 ANA-grade evolution likely lies in an examination of complex evolutionary histories rather than  
557 in a continuation of the debate over appropriate sampling or models.

558 ***QS supports a magnoliid+eudicot ancestor and raises questions about the placement of the***  
559 ***Chloranthaceae and Ceratophyllaceae***— The timings and order of the relationships among the  
560 three “core angiosperm” lineages (eudicots, monocots, and magnoliids) represent the evolution of  
561 three clades that have transformed the biosphere. ZN2014, WI2014, and XI2014 all indicate the  
562 existence of a magnoliid+eudicot clade (Figs. 4B, 5 Fig. 6E, Appendix S6; also in Qiu et al.,  
563 2006; Burleigh et al., 2009; Lee et al., 2011). An alternative monocot+eudicot clade appears in  
564 HS2014 (Fig. 3B), which has been suggested by many other past phylogenies (Jansen et al., 2007;  
565 Moore et al., 2007; Qiu et al., 2010; Soltis et al., 2011). However, in HS2014 the QS scores  
566 counter-support both eudicot+monocots and magnoliids/monocot+eudicot clades. Here again,  
567 despite disagreement among the topologies of the three large-scale phylogenies, the supporting  
568 and counter-supporting QS scores indicate a common evolutionary history.

569 In addition to the three major core angiosperm groups, the Chloranthaceae have frequently

570 been placed in a clade with magnoliids (as in Jansen et al. 2007; Moore et al. 2007; Soltis et al.  
571 2011; Group et al. 2016, and Fig. 3 in Wickett et al. 2014). However, both HS2014 and ZN2014  
572 place Chloranthaceae in a clade with magnoliids, monocot, and eudicots, while WI2014 places it  
573 in a clade with just eudicots (excluding monocots and magnoliids) that is, however,  
574 counter-supported by the sampled quartets (QC=-0.54, QD=0.95).

575 *Ceratophyllum*, often placed as the most closely related group to eudicots (Jansen et al., 2007;  
576 Soltis et al., 2011), in HS2014 appears in a clade with the Chloranthaceae among the prior to  
577 monocot/magnoliid/eudicot splits. However, the branch placing Chloranthaceae+*Ceratophyllum*  
578 lineage in a clade with magnoliids+monocots+eudicots was counter-supported (Fig. 3B) with a  
579 strongly biased QD (0.81). ZN2014 supports *Ceratophyllum* as separate from the core  
580 angiosperms. Given that this question is inextricably linked with the relationships of the three  
581 core angiosperm groups, a consensus was not reached by this information alone. However, this  
582 evidence reopens the question of the relationship of Chloranthaceae and Ceratophyllaceae, both to  
583 each other and to the ANA grade angiosperm lineages (see discussion in Eklund et al., 2004).

584 ***Relatively consistent topology but poor support found within monocots***— Within monocots,  
585 *Acorus* was weakly but consistently supported as a separate clade from the rest of monocots in  
586 HS2014, ZN2014, and WI2014 (Figs. 3B, 4B, 5). In general, the arrangement of monocot orders  
587 in both HS2014 (Fig. 3C) and ZN2014 (Fig. 4C) agreed with recent consensus phylogenies  
588 (Givnish et al., 2010; Soltis et al., 2011; Barrett et al., 2015; Givnish et al., 2016; McKain et al.,  
589 2016).

590 One exception was the placement of Liliales, which has varied in consensus trees and, here,  
591 either was sister to commelinids with weak support (HS2014) or was sister to Asparagales

592 (ZN2014). The commelinid orders were resolved inconsistently between studies. The  
593 commelinid stem branch was counter-supported in both ZN2014 and HS2014 with high QD  
594 values. In HS2014, Arecales were separate from the rest of the commelinids, but the ancestral  
595 commelinid branches both including and excluding Arecales were counter supported. In ZN2014,  
596 Arecales was supported in a clade with Zingiberales and Commelinales, but the ancestral branch  
597 for these three orders has a QD=0.79. This arrangement was consistent with previous phylogenies  
598 (e.g., Givnish et al. (2010)) that have poor support to these relationships. From the QS results, we  
599 would cautiously infer that (1) the relationships among the commelinids are still unknown, (2)  
600 there may be uncharacterized secondary evolutionary history distorting the phylogenetic  
601 placement of these groups, and (3) likely the variable data from both Liliales and Arecales  
602 together have a joint effect that is causing inconsistency in the phylogenetic inference.

603 Finally, in Poaceae, Quartet Sampling made clear the well-characterized discordance and  
604 complex relationships (e.g., Washburn et al., 2015; McKain et al., 2016). The “BOP” clade  
605 (Bambusoideae, Oryzae, Pooideae) was counter-supported in HS2014 and both paraphyletic and  
606 counter-supported in ZN2014. Within the “PACMAD” clade, many of the named subgroupings  
607 were counter-supported with negative QC values. There were particularly high QU values in both  
608 HS2014 and ZN2014 for this clade indicating not only complex support but also low information.  
609 Therefore, even if someone were unfamiliar with the controversies surrounding monocot  
610 phylogenetics (as a whole and within groups), the QS evaluation framework clearly highlights  
611 this group as one with consistently high conflict and counter-support values for the consensus  
612 phylogenies in HS2014 and ZN2014.

613 *Non-rosid/asterid eudicot lineages show substantial disagreement and rogue taxa*— Within  
614 eudicots, Ranunculales were supported as a separate clade from the rest of eudicots by WI2014,  
615 HS2014, XI2014, and CN2015, or among the non-rosid/asterid eudicots in ZN2014 (Figs. 3B,  
616 4B, 5; Appendix S6, Appendix S7). Notably in both ZN2015 and HS2014, *Nelumbo* (sacred  
617 lotus) was placed sister to a highly supported Proteales clade, but support for the  
618 Proteales+*Nelumbo* clade was strongly counter-supported by the QC and QD scores. This again  
619 demonstrates a situation where QS effectively highlights this lineage’s conflicted relationship  
620 with the Proteales in a way that raises questions about a possible genuine biological (rather than  
621 artifactual) cause of phylogenetic discordance.

622 *Vitis vinifera* (common grape vine) has also had variable inferred positions throughout  
623 eudicots. WI2014, XI2014, and CN2015 all place *Vitis* as a “superrosid” and most closely related  
624 clade to the rosids, but with widely ranging support and skew (QC=−0.13 to 0.63, QD=0.56 to  
625 1.0) consistent with the conflict noted by Cannon et al. (2015b) (abbreviated CN2015; Appendix  
626 S7). HS2014 (which sampled 64 Vitales) supported a Dilleniales+Gunnerales+Vitales clade,  
627 while ZN2014 places Vitales+*Tetrastigma* among the rosids in a Vitales+malvid clade to the  
628 exclusion of fabids. In the case of the grape vine, the high support in WI2014 (analyzed by gene  
629 trees) accompanied by a high QD value (1.0) gives strong indication that while Vitales may  
630 belong among the superrosids, an investigation of a secondary evolution history for grapes might  
631 be warranted.

632 For the relationships among the superasterid groups (Caryophyllales, Berberidopsidales,  
633 Santalales, and asterids), a common pattern was found in HS2014, ZN2015, WI2014, and XI2014  
634 of near-zero QC values (−0.03 to 0.08), modest QD values (0–0.03), and high QU values  
635 (0.49–0.86). This led to a consensus QS interpretation of low phylogenetic information, likely as a

636 result of the rapid radiation of these lineages. Generally, these phylogenies tended to support  
637 weakly the controversial placement of Caryophyllales as most closely related to the eudicot  
638 ancestor.

639 ***QS shows strong support for the consensus rosid phylogeny, but substantial discordance***  
640 ***both within and among asterid clades***— HS2014 (Fig. 3D) find similar resolutions among rosid  
641 lineages (Wang et al., 2009; Moore et al., 2010; Soltis et al., 2011; Zhao et al., 2016) (the lone  
642 exception was the Sapindales+Huertales clade). Among the branches leading to major groups, all  
643 were supported and most of the backbone branches were either supported or only weakly  
644 negative. The QS scores also correctly identified a poorly supported relationship in HS2014  
645 between *Cynomorium* and Cucurbitales (QC=-0.31). *Cynomorium*, a non-photosynthetic  
646 parasitic plant with unusual morphology, has been placed tenuously and variably in groups as  
647 diverse as Rosales (Zhang et al., 2009) and Saxifragales (Nickrent et al., 2005), so its poor score  
648 here was expected and confirms the QS method's ability to detect poorly placed species. This  
649 “rogue” status was corroborated by the below-average QF score of QF=0.18 (mean 0.21 for  
650 HS2014). This means that for quartets that include *Cynomorium* as a randomly sampled taxon,  
651 only 18% produced a quartet topology concordant with the HS2014 tree.

652 In contrast to the analysis of the rosid phylogeny from HS2014, the asterid phylogeny from  
653 ZN2014 (Fig. 4D) appears to have substantial discordance and disagreement with most published  
654 phylogenies (Soltis et al., 2011; Beaulieu et al., 2013; Refulio-Rodriguez and Olmstead, 2014).  
655 ZN2014 QS scores supported the unusual hypothesis of a common Ericales+Cornales ancestor,  
656 weakly support the campanulid clade, and counter-support a common lamiid ancestor. The  
657 arrangement of families within Asterales either roughly conforms to Soltis et al. (2011) and

658 Beaulieu et al. (2013), or counter-supported branches ( $QC < 0$ ) that do not agree with these  
659 consensus phylogenies. However, most of the branches that define the relationships among asterid  
660 orders in ZN2014 were counter-supported by the data, though most have QC and QD values close  
661 to zero. This indicates a scenario of a rapid radiation rather than hybridization (though these are  
662 not mutually exclusive). The lamiid groups show strong support for the monophyly of the  
663 *Lamianae* core orders, though in an order different from Stull et al. (2015). Among the asterids  
664 there were also several notably low QF scores for singular genera like *Oncotheca*, *Vahlia*, and  
665 *Pentaphragma* (all  $QF < 0.16$ ). Thus, the QS method in asterids does not necessarily add clarity to  
666 this group, but perhaps more concretely puts into focus the combinations of discordance and low  
667 information occurring in this group.

668 ***QS of shallow-timescale phylotranscriptomic datasets***— So far, we have demonstrated the  
669 utility of quartet sampling on large, sparse alignments which are often computationally intractable  
670 with other support measures. We have also shown, in the case of WI2014, that a relatively large  
671 and full occupied matrix from deep-timescale transcriptomic data can also be evaluated by QS.  
672 However, the QS method can be used to rapidly evaluate phylogenetic support on genome-wide  
673 datasets with little missing data for shorter evolutionary timescales. We tested the QS method on  
674 two phylotranscriptomic datasets for the wild and domesticated tomato clade *Solanum* sect.  
675 *Lycopersicon* (Fig. 8A; Pease et al., 2016b) and carnivorous plants spanning the Caryophyllales  
676 (Fig. 8B; Walker et al., In Press).

677 The *Solanum* phylogeny from Pease et al. (2016b) was inferred from coding sequence  
678 alignment of 33,105,168 nucleotide sites for 30 populations spanning all 13 wild and  
679 domesticated tomato species, and two outgroup species. As described in Pease et al. 2016b, this

680 dataset contains a high level of phylogenetic discordance, but had a consensus phylogeny with  
681 100% NBS support at all but two branches (occurring within a large species complex). However,  
682 gene tree analysis of this group clearly showed evidence of massive phylogenetic discordance.  
683 When we applied QS to this phylogeny using the entire alignment, scores for many branches were  
684 also perfect (i.e., 1/0/0; Table 1). However, several of the other branches in the “Peruvianum  
685 group” species complex had lower QS scores in the full alignment (Fig. 8A). When gene trees  
686 were used (both a quartet of taxa and a gene alignment were randomly chosen for 1000 QS  
687 replicates), all branches had  $QC < 1$  in a manner consistent with the gene tree discordance found  
688 previously in this clade. We also observed the presence of high QD values within the major  
689 subgroups reported for this clade, while nodes defining these groups showed high QC and low  
690 QD values. This accurately captures the results found by Pease et al. (2016b) in terms of the low  
691 discordance between groups versus high discordance within the major groups.

692 Most notably, the tree shown in Fig. 8A includes *S. huaylasense* accession LA1360. This  
693 accession has been known (both from this and other datasets) to mostly likely be a hybrid  
694 between populations from the green-fruited and red-fruited lineages (essentially those accessions  
695 above and below LA1360, respectively, in Fig. 8A). Thus, the inclusion of this putative hybrid  
696 lineage distorted the phylogeny as tree inference methods tried to cope with inherited and  
697 introgressed alleles from two separate groups to place this accession in a consensus location on  
698 the tree. While NBS scores were high for the branches surrounding the placement of LA1360, QS  
699 showed negative QC scores and high QD scores ( $QD=1$  for full alignment). This supports the  
700 presence of the alternative phylogenetic history that has been previously corroborated by other  
701 studies (see additional discussion in the Supplementary Results of Pease et al. 2016b). These data  
702 show clearly that QS was able to distinguish between consistently supported relationships and



703 branches known to have conflict due to introgression (whereas NBS does not).

704 An analysis of transcriptomes of carnivorous plants from Caryophyllales (Fig. 8B; Walker  
705 et al. In Press) showed QC scores consistent with IC scores. The QS scores for the ancestor of  
706 “core Caryophyllales” were near zero and the high QD value when gene trees were used  
707 (QD=0.68) supported the hypothesis of Walker et al. (In Press) that introgressive gene flow may  
708 have occurred among these lineages. The evidence for placing *Drosophyllum* among the  
709 carnivorous Caryophyllales has always been tenuous. The QS analysis here showed not only a  
710 low QF value (QF=0.76, average for WA2017 was 0.89) for this taxon, but also low-QC/high-QD  
711 values for the two branches that form the clade with *Ancistrocladus* and *Nepenthes*. As with the  
712 tomato example above, this example demonstrates how QS scores can highlight an entire region  
713 that may be distorted by the inclusion of a taxon with a strong potential for a secondary  
714 evolutionary history (i.e., possible introgression).

## 715 **CONCLUSION**

716 In this study, our goal was to reanalyze several key and long-contested conflicts in the plant tree  
717 of life by embracing the apparently complex relationships in the plant tree of life. The Quartet  
718 Sampling method that we have described and demonstrated here synthesizes a blend of  
719 phylogenetic and phylogenomic methods to provide a coherent framework for distinguishing  
720 several causes of low phylogenetic branch support. QS also provides a tractable means to analyze  
721 sparse datasets with tens of thousands of taxa but poor sequence overlap. Bootstrap and posterior  
722 probability values have been shown to exhibit irregular behavior or to report uniformly high  
723 confidence scores for large-scale datasets, despite substantial underlying conflict. Even when

724 conventional support measures do report low support, the specific cause of the low support is not  
725 indicated, leaving it open to broad interpretation and speculation. Despite the decades of  
726 documented concerns about the limitations of these support measures, bootstrap proportions  
727 remain the dominant support measure in systematics. Our results, as well as those reported in  
728 many other studies cited here, demonstrate the need for continuing discussion about the nature of  
729 phylogenetic disagreement itself and how best to quantify this complexity. While much testing  
730 and refinement of the QS method is undoubtedly left to be done, we find it provides a key  
731 function that has been missing from other support measures, namely the ability to distinguish  
732 among different causes of low support that commonly occur in modern molecular phylogenies.

733 The application of the QS method to the plant tree of life has also yielded some intriguing  
734 results. The comparison of several recent consensus phylogenies showed that they differ at  
735 several key, disputed relationships. However, when QS scores were compared, only one topology  
736 was supported with the alternatives showing weak support, conflicted support, or even  
737 counter-support (e.g., *Ginkgo* placed in a clade with cycads, Gnetales in a clade with a common  
738 conifer ancestor, monocots separate from a magnoliid+eudicot clade, and Caryophyllales sister to  
739 asterids). QS scores for some other relationships indicated the existence of multiple conflicting  
740 but supported evolutionary histories (e.g., the placement of *Amborella*, possible widespread gene  
741 flow in the monocots, and notoriously difficult-to-place genera like *Haplomitrium*, *Nelumbo*, and  
742 *Cynomorium*). The artist Man Ray once remarked that “We have never attained the infinite variety  
743 and contradictions that exist in nature.” Overall, the picture painted by QS is one of substantial  
744 contradiction, but this conflict can be a richly informative (not just confounding) illustration of  
745 the interwoven evolutionary histories contained within the plant tree of life.

## 746 **ACKNOWLEDGEMENTS**

747 The authors thank Ya Yang, Caroline Parins-Fukuchi, and Kathy Kron for helpful discussions,  
748 and Luke Harmon, Eric Roalson, and Matt Pennell for valuable feedback on drafts. Computations  
749 were performed on the Wake Forest University DEAC Cluster, a centrally managed resource with  
750 support provided in part by the University.

## 751 **FUNDING**

752 SAS and JWB were supported by National Science Foundation Assembling, Visualizing, and  
753 Analyzing the Tree of Life Grant 1208809.

## 754 **LITERATURE CITED**

- 755 Aberer, A. J., D. Krompass, and A. Stamatakis. 2012. Pruning rogue taxa improves phylogenetic  
756 accuracy: an efficient algorithm and webservice. *Systematic Biology* 62: 162–166.
- 757 Alfaro, M. E. 2003. Bayes or bootstrap? A simulation study comparing the performance of  
758 Bayesian Markov chain Monte Carlo sampling and bootstrapping in assessing phylogenetic  
759 confidence. *Molecular Biology and Evolution* 20: 255–266.
- 760 Allman, E. S., L. S. Kubatko, and J. A. Rhodes. 2017. Split scores: a tool to quantify  
761 phylogenetic signal in genome-scale data. *Systematic Biology* .
- 762 Anderson, C. N. K., L. Liu, D. Pearl, and S. V. Edwards. 2012. Tangled trees: the challenge of

- 763 inferring species trees from coalescent and noncoalescent genes. *In* *Methods in Molecular*  
764 *Biology*. Springer Science Business Media, 3–28.
- 765 Andrews, D. W. K. 2000. Inconsistency of the bootstrap when a parameter is on the boundary of  
766 the parameter space. *Econometrica* 68: 399–405.
- 767 Ané, C., B. Larget, D. A. Baum, S. D. Smith, and A. Rokas. 2006. Bayesian estimation of  
768 concordance among gene trees. *Molecular Biology and Evolution* 24: 412–426.
- 769 Anisimova, M. and O. Gascuel. 2006. Approximate likelihood-ratio test for branches: a fast,  
770 accurate, and powerful alternative. *Systematic Biology* 55: 539–552.
- 771 Anisimova, M., M. Gil, J.-F. Dufayard, C. Dessimoz, and O. Gascuel. 2011. Survey of branch  
772 support methods demonstrates accuracy, power, and robustness of fast likelihood-based  
773 approximation schemes. *Systematic Biology* 60: 685–699.
- 774 Banks, J. A., T. Nishiyama, M. Hasebe, J. L. Bowman, M. Gribskov, C. dePamphilis, V. A.  
775 Albert, et al. 2011. The *Selaginella* genome identifies genetic changes associated with the  
776 evolution of vascular plants. *Science* 332: 960–963.
- 777 Barrett, C. F., W. J. Baker, J. R. Comer, J. G. Conran, S. C. Lahmeyer, J. H. Leebens-Mack, J. Li,  
778 et al. 2015. Plastid genomes reveal support for deep phylogenetic relationships and extensive  
779 rate variation among palms and other commelinid monocots. *New Phytologist* 209: 855–870.
- 780 Beaulieu, J. M., D. C. Tank, and M. J. Donoghue. 2013. A Southern Hemisphere origin for  
781 campanulid angiosperms, with traces of the break-up of Gondwana. *BMC Evolutionary*  
782 *Biology* 13: 80.

- 783   Bowe, L. M., G. Coat, and C. W. dePamphilis. 2000. Phylogeny of seed plants based on all three  
784   genomic compartments: extant gymnosperms are monophyletic and Gnetales' closest relatives  
785   are conifers. *Proceedings of the National Academy of Sciences of the United States of America*  
786   97: 4092–4097.
- 787   Brown, J. M. and A. R. Lemmon. 2007. The importance of data partitioning and the utility of  
788   Bayes factors in Bayesian phylogenetics. *Systematic Biology* 56: 643–655.
- 789   Brown, J. M. and R. C. Thomson. 2016. Bayes factors unmask highly variable information  
790   content, bias, and extreme influence in phylogenomic analyses. *Systematic Biology* : syw101.
- 791   Brown, J. W., J. F. Walker, and S. A. Smith. 2017. Phyx: phylogenetic tools for unix.  
792   *Bioinformatics* .
- 793   Burleigh, J. G., K. W. Hilu, and D. E. Soltis. 2009. Inferring phylogenies with incomplete data  
794   sets: a 5-gene, 567-taxon analysis of angiosperms. *BMC Evolutionary Biology* 9: 61.
- 795   Cannon, S. B., M. R. McKain, A. Harkess, M. N. Nelson, S. Dash, M. K. Deyholos, Y. Peng,  
796   et al. 2015a. Data from: Multiple polyploidy events in the early radiation of nodulating and  
797   non-nodulating legumes. Dryad Digital Repository. <http://dx.doi.org/10.5061/dryad.ff11tq>.
- 798   Cannon, S. B., M. R. McKain, A. Harkess, M. N. Nelson, S. Dash, M. K. Deyholos, Y. Peng,  
799   et al. 2015b. Multiple polyploidy events in the early radiation of nodulating and nonnodulating  
800   legumes. *Molecular Biology and Evolution* 32: 193–210.
- 801   Chang, Y. and S. W. Graham. 2011. Inferring the higher-order phylogeny of mosses (Bryophyta)  
802   and relatives using a large, multigene plastid data set. *American Journal of Botany* 98:  
803   839–849.

- 804 Chase, M. W., D. E. Soltis, R. G. Olmstead, D. Morgan, D. H. Les, B. D. Mishler, M. R. Duvall,  
805 et al. 1993. Phylogenetics of seed plants: an analysis of nucleotide sequences from the plastid  
806 gene *rbcL*. *Annals of the Missouri Botanical Garden* 80: 528.
- 807 Chaw, S. M., A. Zharkikh, H. M. Sung, T. C. Lau, and W. H. Li. 1997. Molecular phylogeny of  
808 extant gymnosperms and seed plant evolution: analysis of nuclear 18S rRNA sequences.  
809 *Molecular Biology and Evolution* 14: 56–68.
- 810 Chifman, J. and L. Kubatko. 2014. Quartet inference from SNP data under the coalescent model.  
811 *Bioinformatics* 30: 3317–3324.
- 812 Crane, P. R. 1985. Phylogenetic analysis of seed plants and the origin of angiosperms. *Annals of*  
813 *the Missouri Botanical Garden* : 716–793.
- 814 Cummings, M. P., S. A. Handley, D. S. Myers, D. L. Reed, A. Rokas, and K. Winka. 2003.  
815 comparing bootstrap and posterior probability values in the four-taxon case. *Systematic*  
816 *Biology* 52: 477–487.
- 817 Degnan, J. H. and L. A. Salter. 2005. Gene tree distributions under the coalescent process.  
818 *Evolution* 59: 24–37.
- 819 Douady, C. J., F. Delsuc, Y. Boucher, W. F. Doolittle, and E. J. P. Douzery. 2003. Comparison of  
820 Bayesian and maximum likelihood bootstrap measures of phylogenetic reliability. *Molecular*  
821 *Biology and Evolution* 20: 248–254.
- 822 Drummond, A. J. and A. Rambaut. 2007. BEAST: Bayesian evolutionary analysis by sampling  
823 trees. *BMC Evolutionary Biology* 7: 214.

- 824 Durand, E. Y., N. Patterson, D. Reich, and M. Slatkin. 2011. Testing for ancient admixture  
825 between closely related populations. *Molecular Biology and Evolution* 28: 2239–2252.
- 826 Eaton, D. A. R., E. L. Spriggs, B. Park, and M. J. s. Donoghue. 2016. Misconceptions on missing  
827 data in RAD-seq phylogenetics with a deep-scale example from flowering plants. *Systematic*  
828 *Biology* : syw092.
- 829 Edwards, E. J., R. Nyffeler, and M. J. Donoghue. 2005. Basal cactus phylogeny: implications of  
830 *Pereskia* (Cactaceae) paraphyly for the transition to the cactus life form. *American Journal of*  
831 *Botany* 92: 1177–1188.
- 832 Edwards, S. V., Z. Xi, A. Janke, B. C. Faircloth, J. E. McCormack, T. C. Glenn, B. Zhong, et al.  
833 2016. Implementing and testing the multispecies coalescent model: a valuable paradigm for  
834 phylogenomics. *Molecular Phylogenetics and Evolution* 94: 447–462.
- 835 Efron, B. 1992. Bootstrap methods: another look at the jackknife. *In* Springer Series in Statistics.  
836 Springer Science Business Media, 569–593.
- 837 Eklund, H., J. A. Doyle, and P. S. Herendeen. 2004. Morphological phylogenetic analysis of  
838 living and fossil Chloranthaceae. *International Journal of Plant Sciences* 165: 107–151.
- 839 Farris, J. S., V. A. Albert, M. Kallersjo, D. Lipscomb, and A. G. Kluge. 1996. Parsimony  
840 jackknifing outperforms neighbor-joining. *Cladistics* 12: 99–124.
- 841 Felsenstein, J. 1985. Confidence limits on phylogenies: an approach using the bootstrap.  
842 *Evolution* 39: 783–791.

- 843 Felsenstein, J. and H. Kishino. 1993. Is there something wrong with the bootstrap on  
844 phylogenies? a reply to Hillis and Bull. *Systematic Biology* 42: 193–200.
- 845 Fletcher, W. and Z. Yang. 2009. INDELible: a flexible simulator of biological sequence  
846 evolution. *Molecular Biology and Evolution* 26: 1879–1888.
- 847 Gaither, J. and L. Kubatko. 2016. Hypothesis tests for phylogenetic quartets, with applications to  
848 coalescent-based species tree inference. *Journal of Theoretical Biology* 408: 179–186.
- 849 Givnish, T. J., M. Ames, J. R. McNeal, M. R. McKain, P. R. Steele, C. W. dePamphilis, S. W.  
850 Graham, et al. 2010. Assembling the tree of the monocotyledons: plastome sequence  
851 phylogeny and evolution of Poales. *Annals of the Missouri Botanical Garden* 97: 584–616.
- 852 Givnish, T. J., A. Zuluaga, I. Marques, V. K. Y. Lam, M. S. Gomez, W. J. D. Iles, M. Ames, et al.  
853 2016. Phylogenomics and historical biogeography of the monocot order Liliales: out of  
854 Australia and through Antarctica. *Cladistics* 32: 581–605.
- 855 Goremykin, V. V., S. V. Nikiforova, D. Cavalieri, M. Pindo, and P. Lockhart. 2015. The root of  
856 flowering plants and total evidence. *Systematic Biology* 64: 879–891.
- 857 Goulet, B. E., F. Roda, and R. Hopkins. 2017. Hybridization in plants: old ideas, new techniques.  
858 *Plant Physiology* 173: 65–78.
- 859 Green, R. E., J. Krause, A. W. Briggs, T. Maricic, U. Stenzel, M. Kircher, N. Patterson, et al.  
860 2010. A draft sequence of the neandertal genome. *Science* 328: 710–722.
- 861 Group, T. A. P., M. W. Chase, M. J. M. Christenhusz, M. F. Fay, J. W. Byng, W. S. Judd, D. E.



- 862 Soltis, et al. 2016. An update of the Angiosperm Phylogeny Group classification for the orders  
863 and families of flowering plants: APG IV. *Botanical Journal of the Linnean Society* 181: 1–20.
- 864 Guindon, S., J.-F. Dufayard, V. Lefort, M. Anisimova, W. Hordijk, and O. Gascuel. 2010. New  
865 algorithms and methods to estimate maximum-likelihood phylogenies: assessing the  
866 performance of PhyML 3.0. *Systematic Biology* 59: 307–321.
- 867 Hahn, M. W. and L. Nakhleh. 2015. Irrational exuberance for resolved species trees. *Evolution*  
868 70: 7–17.
- 869 Hillis, D. M. and J. J. Bull. 1993. An empirical test of bootstrapping as a method for assessing  
870 confidence in phylogenetic analysis. *Systematic Biology* 42: 182–192.
- 871 Hinchliff, C. E. and E. H. Roalson. 2013. Using supermatrices for phylogenetic inquiry: an  
872 example using the sedges. *Systematic Biology* 62: 205–219.
- 873 Hinchliff, C. E. and S. A. Smith. 2014a. Data from: Some limitations of public sequence data for  
874 phylogenetic inference (in plants). Dryad Digital Repository.  
875 <http://dx.doi.org/10.5061/dryad.450qq>.
- 876 Hinchliff, C. E. and S. A. Smith. 2014b. Some limitations of public sequence data for  
877 phylogenetic inference (in plants). *PLoS ONE* 9: e98986.
- 878 Huelsenbeck, J. and B. Rannala. 2004. Frequentist properties of Bayesian posterior probabilities  
879 of phylogenetic trees under simple and complex substitution models. *Systematic Biology* 53:  
880 904–913.
- 881 Jansen, R. K., Z. Cai, L. A. Raubeson, H. Daniell, C. W. dePamphilis, J. Leebens-Mack, K. F.

- 882 Muller, et al. 2007. Analysis of 81 genes from 64 plastid genomes resolves relationships in  
883 angiosperms and identifies genome-scale evolutionary patterns. *Proceedings of the National*  
884 *Academy of Sciences of the United States of America* 104: 19369–19374.
- 885 Jiao, Y., N. J. Wickett, S. Ayyampalayam, A. S. Chanderbali, L. Landherr, P. E. Ralph, L. P.  
886 Tomsho, et al. 2011. Ancestral polyploidy in seed plants and angiosperms. *Nature* 473:  
887 97–100.
- 888 Kobert, K., L. Salichos, A. Rokas, and A. Stamatakis. 2016. Computing the internode certainty  
889 and related measures from partial gene trees. *Molecular Biology and Evolution* 33: 1606–1617.
- 890 Larget, B. 2013. The estimation of tree posterior probabilities using conditional clade probability  
891 distributions. *Systematic Biology* 62: 501–511.
- 892 Larget, B. and D. L. Simon. 1999. Markov chain Monte Carlo algorithms for the Bayesian  
893 analysis of phylogenetic trees. *Molecular Biology and Evolution* 16: 750–759.
- 894 Lee, E. K., A. Cibrian-Jaramillo, S.-O. Kolokotronis, M. S. Katari, A. Stamatakis, M. Ott, J. C.  
895 Chiu, et al. 2011. A functional phylogenomic view of the seed plants. *PLoS Genetics* 7:  
896 e1002411.
- 897 Matasci, N., L.-H. Hung, Z. Yan, E. J. Carpenter, N. J. Wickett, S. Mirarab, N. Nguyen, et al.  
898 2014. Data access for the 1,000 Plants (1KP) project. *GigaScience* 3.
- 899 McKain, M. R., H. Tang, J. R. McNeal, S. Ayyampalayam, J. I. Davis, C. W. dePamphilis, T. J.  
900 Givnish, et al. 2016. A phylogenomic assessment of ancient polyploidy and genome evolution  
901 across the Poales. *Genome Biology and Evolution* : evw060.

- 902 Minh, B. Q., M. A. T. Nguyen, and A. von Haeseler. 2013. Ultrafast approximation for  
903 phylogenetic bootstrap. *Molecular Biology and Evolution* 30: 1188–1195.
- 904 Mirarab, S., R. Reaz, M. S. Bayzid, T. Zimmermann, M. S. Swenson, and T. Warnow. 2014.  
905 ASTRAL: genome-scale coalescent-based species tree estimation. *Bioinformatics* 30:  
906 i541–i548.
- 907 Misof, B., B. Meyer, B. von Reumont, P. Kück, K. Misof, and K. Meusemann. 2013. Selecting  
908 informative subsets of sparse supermatrices increases the chance to find correct trees. *BMC*  
909 *Bioinformatics* 14: 348.
- 910 Moore, M. J., C. D. Bell, P. S. Soltis, and D. E. Soltis. 2007. Using plastid genome-scale data to  
911 resolve enigmatic relationships among basal angiosperms. *Proceedings of the National*  
912 *Academy of Sciences of the United States of America* 104: 19363–19368.
- 913 Moore, M. J., P. S. Soltis, C. D. Bell, J. G. Burleigh, and D. E. Soltis. 2010. Phylogenetic analysis  
914 of 83 plastid genes further resolves the early diversification of eudicots. *Proceedings of the*  
915 *National Academy of Sciences of the United States of America* 107: 4623–4628.
- 916 Nickrent, D. L., J. P. Der, and F. E. Anderson. 2005. Discovery of the photosynthetic relatives of  
917 the “Maltese mushroom” *Cynomorium*. *BMC Evolutionary Biology* 5: 38.
- 918 Nickrent, D. L., C. L. Parkinson, J. D. Palmer, and R. J. Duff. 2000. Multigene phylogeny of land  
919 plants with special reference to bryophytes and the earliest land plants. *Molecular Biology and*  
920 *Evolution* 17: 1885–1895.
- 921 Nylander, J., F. Ronquist, J. Huelsenbeck, and J. Nieves-aldrey. 2004. Bayesian phylogenetic  
922 analysis of combined data. *Systematic Biology* 53: 47–67.

- 923 Ogden, T. H. and M. S. Rosenberg. 2006. Multiple sequence alignment accuracy and  
924 phylogenetic inference. *Systematic Biology* 55: 314–328.
- 925 Palmer, J. D., D. E. Soltis, and M. W. Chase. 2004. The plant tree of life: an overview and some  
926 points of view. *American Journal of Botany* 91: 1437–1445.
- 927 Pease, J. B., D. C. Haak, M. W. Hahn, and L. C. Moyle. 2016a. Data from: Phylogenomics  
928 reveals three sources of adaptive variation during a rapid radiation. Dryad Digital Repository.  
929 <http://dx.doi.org/10.5061/dryad.182dv>.
- 930 Pease, J. B., D. C. Haak, M. W. Hahn, and L. C. Moyle. 2016b. Phylogenomics reveals three  
931 sources of adaptive variation during a rapid radiation. *PLoS Biology* 14: e1002379.
- 932 Pease, J. B. and M. W. Hahn. 2015. Detection and polarization of introgression in a five-taxon  
933 phylogeny. *Systematic Biology* 64: 651–662.
- 934 PPG I. 2016. A community-derived classification for extant lycophytes and ferns. *Journal of*  
935 *Systematics and Evolution* 54: 563–603.
- 936 Price, M. N., P. S. Dehal, and A. P. Arkin. 2010. FastTree 2—approximately maximum-likelihood  
937 trees for large alignments. *PLoS ONE* 5: e9490.
- 938 Pryer, K. M., L. Huiet, F.-W. Li, C. J. Rothfels, and E. Schuettpelz. 2016a. Data from:  
939 Maidenhair ferns, *Adiantum*, are indeed monophyletic and sister to shoestring ferns, vittarioids  
940 (Pteridaceae). Dryad Digital Repository. <http://dx.doi.org/10.5061/dryad.4m6s6>.
- 941 Pryer, K. M., L. Huiet, F.-W. Li, C. J. Rothfels, and E. Schuettpelz. 2016b. Maidenhair ferns

- 942 (*Adiantum*) are indeed monophyletic and sister to shoestring ferns, vittarioids (Pteridaceae).
- 943 *Systematic Botany* 41: 17–23.
- 944 Pryer, K. M., H. Schneider, A. R. Smith, R. Cranfill, P. G. Wolf, J. S. Hunt, and S. D. Sipes. 2001.
- 945 Horsetails and ferns are a monophyletic group and the closest living relatives to seed plants.
- 946 *Nature* 409: 618–622.
- 947 Pryer, K. M., E. Schuettpelz, P. G. Wolf, H. Schneider, A. R. Smith, and R. Cranfill. 2004.
- 948 Phylogeny and evolution of ferns (monilophytes) with a focus on the early leptosporangiate
- 949 divergences. *American Journal of Botany* 91: 1582–1598.
- 950 Qiu, Y.-L., J. Lee, F. Bernasconi-Quadroni, D. E. Soltis, P. S. Soltis, M. Zanis, E. A. Zimmer,
- 951 et al. 1999. The earliest angiosperms: evidence from mitochondrial, plastid and nuclear
- 952 genomes. *Nature* 402: 404–407.
- 953 Qiu, Y.-L., L. Li, B. Wang, Z. Chen, V. Knoop, M. Groth-Malonek, O. Dombrovska, et al. 2006.
- 954 The deepest divergences in land plants inferred from phylogenomic evidence. *Proceedings of*
- 955 *the National Academy of Sciences of the United States of America* 103: 15511–15516.
- 956 Qiu, Y.-L., L. Li, B. Wang, J.-Y. Xue, T. A. Hendry, R.-Q. Li, J. W. Brown, et al. 2010.
- 957 Angiosperm phylogeny inferred from sequences of four mitochondrial genes. *Journal of*
- 958 *Systematics and Evolution* 48: 391–425.
- 959 Ranwez, V. and O. Gascuel. 2001. Quartet-based phylogenetic inference: improvements and
- 960 limits. *Molecular Biology and Evolution* 18: 1103–1116.
- 961 Refulio-Rodriguez, N. F. and R. G. Olmstead. 2014. Phylogeny of Lamiidae. *American Journal*
- 962 *of Botany* 101: 287–299.

- 963 Reich, D., K. Thangaraj, N. Patterson, A. L. Price, and L. Singh. 2009. Reconstructing Indian  
964 population history. *Nature* 461: 489–494.
- 965 Reid, N. M., S. M. Hird, J. M. Brown, T. A. Pelletier, J. D. McVay, J. D. Satler, and B. C.  
966 Carstens. 2013. Poor fit to the multispecies coalescent is widely detectable in empirical data.  
967 *Systematic Biology* 63: 322–333.
- 968 Renzaglia, K. S., R. J. Duff, D. L. Nickrent, and D. J. Garbary. 2000. Vegetative and reproductive  
969 innovations of early land plants: implications for a unified phylogeny. *Philosophical*  
970 *Transactions of the Royal Society B: Biological Sciences* 355: 769–793.
- 971 Rice, D. W., A. J. Alverson, A. O. Richardson, G. J. Young, M. V. Sanchez-Puerta, J. Munzinger,  
972 K. Barry, et al. 2013. Horizontal transfer of entire genomes via mitochondrial fusion in the  
973 angiosperm *Amborella*. *Science* 342: 1468–1473.
- 974 Rokas, A., B. L. Williams, N. King, and S. B. Carroll. 2003. Genome-scale approaches to  
975 resolving incongruence in molecular phylogenies. *Nature* 425: 798–804.
- 976 Ronquist, F. and J. P. Huelsenbeck. 2003. MrBayes 3: Bayesian phylogenetic inference under  
977 mixed models. *Bioinformatics* 19: 1572–1574.
- 978 Ronquist, F., M. Teslenko, P. van der Mark, D. L. Ayres, A. Darling, S. Hohna, B. Larget, et al.  
979 2012. MrBayes 3.2: efficient Bayesian phylogenetic inference and model choice across a large  
980 model space. *Systematic Biology* 61: 539–542.
- 981 Rosenberg, N. A. 2002. The probability of topological concordance of gene trees and species  
982 trees. *Theoretical Population Biology* 61: 225–247.

- 983 Roure, B., D. Baurain, and H. Philippe. 2012. Impact of missing data on phylogenies inferred  
984 from empirical phylogenomic data sets. *Molecular Biology and Evolution* 30: 197–214.
- 985 Salichos, L., A. Stamatakis, and A. Rokas. 2014. Novel information theory-based measures for  
986 quantifying incongruence among phylogenetic trees. *Molecular Biology and Evolution* 31:  
987 1261–1271.
- 988 Sanderson, M. J. 1995. Objections to bootstrapping phylogenies: a critique. *Systematic Biology*  
989 44: 299.
- 990 Sayyari, E. and S. Mirarab. 2016. Fast coalescent-based computation of local branch support  
991 from quartet frequencies. *Molecular Biology and Evolution* : msw079.
- 992 Shavit Grievink, L., D. Penny, M. D. Hendy, and B. R. Holland. 2010. Phylogenetic tree  
993 reconstruction accuracy and model fit when proportions of variable sites change across the tree.  
994 *Systematic Biology* 59: 288–297.
- 995 Shaw, A. J., P. Szövényi, and B. Shaw. 2011. Bryophyte diversity and evolution: windows into  
996 the early evolution of land plants. *American Journal of Botany* 98: 352–369.
- 997 Shen, X.-X., C. T. Hittinger, and A. Rokas. 2017. Contentious relationships in phylogenomic  
998 studies can be driven by a handful of genes. *Nature Ecology & Evolution* 1: 0126.
- 999 Simmons, M. P. 2016. Mutually exclusive phylogenomic inferences at the root of the  
1000 angiosperms: *Amborella* is supported as sister and Observed Variability is biased. *Cladistics* .
- 1001 Simmons, M. P. and A. P. Norton. 2014. Divergent maximum-likelihood-branch-support values  
1002 for polytomies. *Molecular Phylogenetics and Evolution* 73: 87–96.

- 1003 Simmons, M. P. and C. P. Randle. 2014. Disparate parametric branch-support values from  
1004 ambiguous characters. *Molecular Phylogenetics and Evolution* 78: 66–86.
- 1005 Smith, S. A., J. M. Beaulieu, and M. J. Donoghue. 2009. Mega-phylogeny approach for  
1006 comparative biology: an alternative to supertree and supermatrix approaches. *BMC*  
1007 *Evolutionary Biology* 9: 37.
- 1008 Smith, S. A., J. M. Beaulieu, A. Stamatakis, and M. J. Donoghue. 2011. Understanding  
1009 angiosperm diversification using small and large phylogenetic trees. *American Journal of*  
1010 *Botany* 98: 404–414.
- 1011 Smith, S. A., M. J. Moore, J. W. Brown, and Y. Yang. 2015. Analysis of phylogenomic datasets  
1012 reveals conflict, concordance, and gene duplications with examples from animals and plants.  
1013 *BMC Evolutionary Biology* 15.
- 1014 Soltis, D. E., S. A. Smith, N. Cellinese, K. J. Wurdack, D. C. Tank, S. F. Brockington, N. F.  
1015 Refulio-Rodriguez, et al. 2011. Angiosperm phylogeny: 17 genes, 640 taxa. *American Journal*  
1016 *of Botany* 98: 704–730.
- 1017 Stamatakis, A. 2014. RAxML version 8: a tool for phylogenetic analysis and post-analysis of  
1018 large phylogenies. *Bioinformatics* 30: 1312–1313.
- 1019 Stamatakis, A., P. Hoover, and J. Rougemont. 2008. A rapid bootstrap algorithm for the RAxML  
1020 Web servers. *Systematic Biology* 57: 758–771.
- 1021 Steel, M. and M. J. Sanderson. 2010. Characterizing phylogenetically decisive taxon coverage.  
1022 *Applied Mathematics Letters* 23: 82–86.



- 1023 Steemans, P., A. L. Herisse, J. Melvin, M. A. Miller, F. Paris, J. Verniers, and C. H. Wellman.  
1024 2009. Origin and radiation of the earliest vascular land plants. *Science* 324: 353–353.
- 1025 Stefanović, S., D. W. Rice, and J. D. Palmer. 2004. Long branch attraction, taxon sampling, and  
1026 the earliest angiosperms: *Amborella* or monocots? *BMC Evolutionary Biology* 4: 35.
- 1027 Strimmer, K., N. Goldman, and A. von Haeseler. 1997. Bayesian probabilities and quartet  
1028 puzzling. *Molecular Biology and Evolution* 14: 210–211.
- 1029 Strimmer, K. and A. von Haeseler. 1997. Likelihood-mapping: a simple method to visualize  
1030 phylogenetic content of a sequence alignment. *Proceedings of the National Academy of*  
1031 *Sciences of the United States of America* 94: 6815–6819.
- 1032 Stull, G. W., R. D. de Stefano, D. E. Soltis, and P. S. Soltis. 2015. Resolving basal lamiid  
1033 phylogeny and the circumscription of Icacinaceae with a plastome-scale data set. *American*  
1034 *Journal of Botany* 102: 1794–1813.
- 1035 Suzuki, Y., G. V. Glazko, and M. Nei. 2002. Overcredibility of molecular phylogenies obtained  
1036 by Bayesian phylogenetics. *Proceedings of the National Academy of Sciences of the United*  
1037 *States of America* 99: 16138–16143.
- 1038 Swofford, D. L. and J. Sullivan. 2003. The phylogenetic handbook, volume 7, chapter Phylogeny  
1039 inference based on parsimony and other methods using PAUP\*. Cambridge University Press.  
1040 ISBN 0521730716, 160–206.
- 1041 Taylor, Z. N., D. W. Rice, and J. D. Palmer. 2015. The complete moss mitochondrial genome in  
1042 the angiosperm *Amborella* is a chimera derived from two moss whole-genome transfers. *PLoS*  
1043 *ONE* 10: e0137532.

- 1044 Testo, W. and M. Sundue. 2016. A 4000-species dataset provides new insight into the evolution of  
1045 ferns. *Molecular Phylogenetics and Evolution* 105: 200–211.
- 1046 The Amborella Genome Project. 2013. The *Amborella* genome and the evolution of flowering  
1047 plants. *Science* 342: 1241089–1241089.
- 1048 Walker, J. F., Y. Yang, M. J. Moore, J. Mikenas, A. Timoneda, S. F. Brockington, and S. A. Smith.  
1049 2017. Data from: Widespread paleopolyploidy, gene tree conflict, and recalcitrant relationships  
1050 among the carnivorous Caryophyllales. Dryad Digital Repository. In press.
- 1051 Walker, J. F., Y. Yang, M. J. Moore, J. Mikenas, A. Timoneda, S. F. Brockington, and S. A. Smith.  
1052 In Press. Widespread paleopolyploidy, gene tree conflict, and recalcitrant relationships among  
1053 the carnivorous Caryophyllales. *American Journal of Botany* .
- 1054 Wang, H., M. J. Moore, P. S. Soltis, C. D. Bell, S. F. Brockington, R. Alexandre, C. C. Davis,  
1055 et al. 2009. Rosid radiation and the rapid rise of angiosperm-dominated forests. *Proceedings of*  
1056 *the National Academy of Sciences of the United States of America* 106: 3853–3858.
- 1057 Washburn, J. D., J. C. Schnable, G. Davidse, and J. C. Pires. 2015. Phylogeny and photosynthesis  
1058 of the grass tribe Paniceae. *American Journal of Botany* 102: 1493–1505.
- 1059 Wickett, N. J., S. Mirarab, N. Nguyen, T. Warnow, E. Carpenter, N. Matasci, S. Ayyampalayam,  
1060 et al. 2014. Phylotranscriptomic analysis of the origin and early diversification of land plants.  
1061 *Proceedings of the National Academy of Sciences of the United States of America* 111:  
1062 E4859–E4868.
- 1063 Wiens, J. J. and M. C. Morrill. 2011. Missing data in phylogenetic analysis: reconciling results  
1064 from simulations and empirical data. *Systematic Biology* 60: 719–731.

- 1065 Wilcox, T. P., D. J. Zwickl, T. A. Heath, and D. M. Hillis. 2002. Phylogenetic relationships of the  
1066 dwarf boas and a comparison of Bayesian and bootstrap measures of phylogenetic support.  
1067 *Molecular Phylogenetics and Evolution* 25: 361–371.
- 1068 Wilkinson, M. 1996. Majority-rule reduced consensus trees and their use in bootstrapping.  
1069 *Molecular Biology and Evolution* 13: 437–444.
- 1070 Xi, Z., L. Liu, J. S. Rest, and C. C. Davis. 2014a. Coalescent versus concatenation methods and  
1071 the placement of *Amborella* as sister to water lilies. *Systematic Biology* 63: 919–932.
- 1072 Xi, Z., L. Liu, J. S. Rest, and C. C. Davis. 2014b. Data from: Coalescent versus concatenation  
1073 methods and the placement of *Amborella* as sister to water lilies. Dryad Digital Repository.  
1074 <http://dx.doi.org/10.5061/dryad.qb251>.
- 1075 Xi, Z., J. S. Rest, and C. C. Davis. 2013. Phylogenomics and coalescent analyses resolve extant  
1076 seed plant relationships. *PLoS ONE* 8: e80870.
- 1077 Yang, Y., M. J. Moore, S. F. Brockington, D. E. Soltis, G. K.-S. Wong, E. J. Carpenter, Y. Zhang,  
1078 et al. 2015. Dissecting molecular evolution in the highly diverse plant clade Caryophyllales  
1079 using transcriptome sequencing. *Molecular Biology and Evolution* 32: 2001–2014.
- 1080 Zanne, A. E., D. C. Tank, W. K. Cornwell, J. M. Eastman, S. A. Smith, R. G. FitzJohn, D. J.  
1081 McGlinn, et al. 2014a. Data from: Three keys to the radiation of angiosperms into freezing  
1082 environments. Dryad Digital Repository. <http://dx.doi.org/10.5061/dryad.63q27.2>.
- 1083 Zanne, A. E., D. C. Tank, W. K. Cornwell, J. M. Eastman, S. A. Smith, R. G. FitzJohn, D. J.  
1084 McGlinn, et al. 2014b. Three keys to the radiation of angiosperms into freezing environments.  
1085 *Nature* 506: 89–92.

- 1086 Zhang, Z.-H., L. I. Chun-Qi, and L. I. Jianhua. 2009. Phylogenetic placement *Cynomorium* in  
1087 Rosales inferred from sequences of the inverted repeat region of the chloroplast genome.  
1088 *Journal of Systematics and Evolution* 47: 297–304.
- 1089 Zhao, L., X. Li, N. Zhang, S.-D. Zhang, T.-S. Yi, H. Ma, Z.-H. Guo, et al. 2016. Phylogenomic  
1090 analyses of large-scale nuclear genes provide new insights into the evolutionary relationships  
1091 within the rosids. *Molecular Phylogenetics and Evolution* 105: 166–176.
- 1092 Zhong, B., L. Liu, Z. Yan, and D. Penny. 2013a. Origin of land plants using the multispecies  
1093 coalescent model. *Trends in Plant Science* 18: 492–495.
- 1094 Zhong, B., Z. Xi, V. V. Goremykin, R. Fong, P. A. Mclenachan, P. M. Novis, C. C. Davis, et al.  
1095 2013b. Streptophyte algae and the origin of land plants revisited using heterogeneous models  
1096 with three new algal chloroplast genomes. *Molecular Biology and Evolution* 31: 177–183.
- 1097 Zwickl, D. J. and D. M. Hillis. 2002. Increased taxon sampling greatly reduces phylogenetic  
1098 error. *Systematic Biology* 51: 588–598.
- 1099 Zwickl, D. J., J. C. Stein, R. A. Wing, D. Ware, and M. J. Sanderson. 2014. Disentangling  
1100 methodological and biological sources of gene tree discordance on *Oryza* (Poaceae)  
1101 chromosome 3. *Systematic Biology* 63: 645–659.

Table 1: Quartet Sampling (QS) score interpretation. See text for details.

| Example QS Score (QC/QD/QU)* | Interpretation                                                                                                                                                                                                                    |
|------------------------------|-----------------------------------------------------------------------------------------------------------------------------------------------------------------------------------------------------------------------------------|
| 1.0/-/0.0                    | <b>Full support:</b> All sampled quartet replicates support the focal branch (QC=1) with no uncertainty when likelihood cutoffs are used (QU=0).                                                                                  |
| 0.5/0.02/0.03                | <b>Strong support:</b> A strong majority of quartets support the focal branch (QC=0.5) and the low skew in discordant frequencies (QD≈0) indicate no alternative history is favored.                                              |
| 0.7/0.9/0.03                 | <b>Strong support with discordant skew:</b> A strong majority of quartets support the focal branch (QC=0.7), but the skew in discordance (QD=0.9) indicates the possible presence of a supported secondary evolutionary history.  |
| 0.05/0.04/0.03               | <b>Weak support:</b> Only a weak majority of quartets support the focal branch (QC=0.05), and the frequency of all three possible topologies are similar (QD≈0).                                                                  |
| 0.1/0.9/0.03                 | <b>Weak support with discordant skew:</b> Only a weak majority of quartets support the focal branch (QC=0.1), and the skew in discordance (QD=0.9) indicates the possible presence of a supported secondary evolutionary history. |
| -0.5/0.9/0.07                | <b>Counter-support:</b> A strong majority of quartets support one of the alternative discordant quartet arrangements history (QC<0; QD expected to be high).                                                                      |
| 1/0.03/0.95                  | <b>Poorly informed:</b> Despite supportive QC/QD values, 95% of quartets failed the likelihood cutoff (QU=0.95), likely indicating few informative sites.                                                                         |
| 0.0/0.0/0.0                  | <b>Perfectly conflicted:</b> The (unlikely) case where the frequency of all three possible trees was equal with no uncertainty, indicating a rapid radiation or highly complex conflict.                                          |

1102 Notes: \* QC = Quartet Concordance; QD = Quartet Differential; QU = Quartet Uncertainty.

## 1103 FIGURE LEGENDS

1104 **Fig. 1.** Description of the Quartet Sampling method. (A) The focal branch “*b*” divides the phylogeny into four  
1105 subclades  $\{S_1, S_2, S_3, S_4\}$  from which tips (A–J) are sampled. Two replicates with different sampled tips for the  
1106 given branch are shown with the three possible unrooted topologies (one concordant and two discordant). (B) Each  
1107 internal branch is labeled with a set of three scores (QC/QD/QU), which offer different, but complementary,  
1108 information. Terminal branches are evaluated by the QF score, which reports the frequency of a taxon generating  
1109 concordant topologies. (See Materials and Methods for full details and Supplementary Methods for a technical  
1110 description.)

1111  
1112 **Fig. 2.** Results of Simulation Testing of the Quartet Sampling Method. (A) QC values converge on a central value  
1113 with increasing numbers of replicates from randomly selected branches from simulated trees with 50, 100, and 500  
1114 taxa. (B) Distributions of QC, QU, and QF values for HS2014 (black), ZN2014 (dotted black), and  
1115 XI2014/CN2015/PR2016/WA2017 (similar distributions; gray solid). (C) Mean QC values (diamond) with 5%ile to  
1116 95%ile (whiskers) for branches in HS2015 binned by the number of subtending taxa (i.e., moving root-ward in the  
1117 tree left-to-right). Overall mean is shown with horizontal dotted line.

1118  
1119 **Fig. 3.** Phylogeny from Hinchliff and Smith (2014b). (A) Full phylogeny with heat map coloration of branches by  
1120 QC scores for internal branches: dark green ( $QC > 0.2$ ), light green ( $0.2 \leq QC < 0$ ), light orange ( $0 \leq QC \leq -0.05$ ), or  
1121 dark orange ( $QC < -0.05$ ). (B) QC/QD/QU scores (200 replicates of full alignment) for major plant groups and key  
1122 orders within angiosperms. QC/QD/QU scores after group names are for the ancestral branch (i.e., the “stem”  
1123 branch), and a single QF score is shown for monotypic tips. Major subgroups groups are highlighted with vertical  
1124 labels. (C) QS scores for monocots (excluding *Acorus*). (D,E,F) QS scores for rosids, Bryophyta, and gymnosperms.  
1125 Abbreviations: Acro, Acrogymnospermae; ANA, ANA grade; Aru, Arundinoideae; Bry, Bryophyta, Chl,  
1126 Chloridoideae; Dan, Danthonioideae; Mar, Marchantiophyta; Poly, Polypodopsida.

1127

1128 **Fig. 4.** Phylogeny from Zanne et al. (2014b). (A) Full phylogeny with heat map coloration of branches by QC scores

1129 for internal branches using same color scheme as (Fig. 3). (B) QC/QD/QU scores (200 replicates of full alignment)  
1130 for major plant groups and key orders within angiosperms, using same color scheme as (Fig. 3). (C) QS scores shown  
1131 for monocots (except *Acorus*). (D) QS scores for asterids. (E) QS scores for fern lineages and (F) QS scores for  
1132 gymnosperm lineages respectively. Abbreviations: Alseu, Alseuosmiaceae; ANA, ANA grade angiosperms; Argo,  
1133 Argophyllaceae; Aster, Asteraceae; Bory, Boryaceae; Caly, Calycanthaceae; Eriach, Eriachneae; Good,  
1134 Goodeniaceae; gym, gymnosperms; Hypox, Hypoxidaceae; Isach, Isachneae; Phell, Phellinaceae; Poly,  
1135 Polypodopsida.

1136

1137 **Fig. 5.** Maximum likelihood phylogeny spanning Viridiplantae from Fig. 2 in Wickett et al. (2014) with QC/QD/QU  
1138 scores for 200 replicates of the full alignment. Nodes are colored according to QC score using same color scheme as  
1139 (Fig. 3). Bootstrap values (italicized in square brackets) from Wickett et al. (2014) are shown for comparison.  
1140 Missing QS or bootstrap values indicate a perfect score. The three taxa with the lowest QF values are highlighted.  
1141 Species names have been excluded or abbreviated in the case where two congeners are included.

1142

1143 **Fig. 6.** Key phylogenetic disagreements with QC scores using compared across various datasets. Branches for  
1144 HS2014 and ZN2014 were resampled with 10000 replicates. Branches for WI2014 and XI2014 were exhaustively  
1145 sampled (>1000 replicates). Highlighting on QC values follows the same colors as Fig. 3. “Conifers-II” refers to a  
1146 hypothesized clade comprising the non-Pinales orders in Pinidae. Abbreviations: Gnet, Gnetidae; Pin, Pinidae.

1147

1148 **Fig. 7.** Phylogeny of Pteridaceae ferns from Pryer et al. (2016b) with QC/QD/QU scores for 200 replicates of the full  
1149 alignment. Nodes are colored according to QC score using same color scheme as (Fig. 3).

1150 Bootstrap/SH-test/posterior probability values (italicized in square brackets) are shown for comparison. Omitted  
1151 values indicate a perfect score. The three taxa with the lowest QF values are highlighted. Abbreviations: *Pityro*,

1152 *Pityrogramma*.

1153

1154 **Fig. 8.** QS scores for phylogenies from whole-transcriptome data. Omitted values indicate a perfect score. Nodes are  
1155 colored according to QC score using same color scheme as (Fig. 3). (A) Phylogeny of *Solanum* sect. *Lycopersicon*

1156 from Pease et al. (2016b) Bootstrap values (italicized in square brackets) are shown for comparison. (B) Phylogeny  
1157 of Caryophyllales from Walker et al. (In Press) IC scores (light grey) are shown for comparison (all bootstrap and  
1158 SH-test scores were 100). The three taxa with the lowest QF values are highlighted.



## 1159 APPENDICES

1160 **Appendix S1.** Supplementary Methods providing a technical description of the QS method

1161

1162 **Appendix S2.** Comparison of QC and bootstrap ICA (information criterion-all; Salichos, et al. 2014) scores on trees

1163 reconstructed from 100 simulated datasets with 50 taxa with 1,000 base pairs under a Jukes-Cantor model of

1164 evolution. Blue circles represent branches in the true tree, with the size of the circle proportional to the log of the

1165 number of substitutions. Red triangles represent branches not in the true tree.

1166

1167 **Appendix S3.** Comparison of the rapid bootstrap and quartet sampling on the ML/PP consensus tree. For each

1168 branch, the RBS, QS (raw concordant frequency (Freq1), QC score), SH, and PP scores are presented (clockwise

1169 from top left in each legend). Black dots identify clades that are not in the true tree.

1170

1171 **Appendix S4.** Shows the consistency of the frequency of concordant quartets ( $f_1$ ), QC, and QD toward a central

1172 value with increasing number of per-branch replicates for a randomly selected branch. Trees with 50 taxa (left), 100

1173 taxa (center), and 500 taxa (right) are shown. Boxes show median  $\pm$  IQR. Whiskers show 5<sup>th</sup>–95<sup>th</sup> percentile, with

1174 values outside this range shown as circle points.

1175

1176 **Appendix S5.** Histograms (top row) showing the distributions of QC (left), QU (middle), and QF (right) values for

1177 the HS2014 dataset (green), ZN2014 (black), and smaller dataset (XI2014, CN2015, PR2016, WA2017) with similar

1178 distributions (orange). Scatter plots (bottom row) showing the close (but non-linear) relationship between QC and

1179 raw concordant quartet frequency ( $f_1$ ; left), bounded but otherwise uncorrelated relationships between QC and QD

1180 (middle), and QC and QU (right). See main text for dataset abbreviations.

1181

1182 **Appendix S6.** Phylogeny of angiosperms from Xi et al. (2014a) with QC/QD/QU scores for 200 replicates of the full

1183 alignment and for 200 replicates from individual gene trees (in parentheses). Nodes are colored according to QC

1184 score using same color scheme as (Fig. 3). MrBayes PP/RAxML NBS values (italicized in square brackets) from Xi

1185 et al. (2013). are shown for comparison. Perfect scores for any given test are omitted or shown as ‘\*’ indicates  
1186 bootstrap of 100, while ‘-’ indicates a missing value. The three taxa with the lowest QF values are highlighted.  
1187

1188 **Appendix S7.** Phylogeny from Cannon et al. (2015b) with QC/QD/QU scores for 200 replicates of the full alignment.  
1189 Nodes are colored according to QC score using same color scheme as (Fig. 3). Bootstrap values (italicized in square  
1190 brackets) are shown for comparison. Perfect scores for any given test are omitted or shown as ‘\*’ indicates bootstrap  
1191 of 100, while “-” indicates a missing value. The three taxa with the lowest QF values are highlighted.  
1192

1193 **Appendix S8.** Relationship between QC and frequencies of the three possible alternative quartet topologies from QS  
1194 runs on simulated data. Points represent branches in the trees, with the “test topology” axis identifying the frequency  
1195 at which the topology consistent with the tree was recovered across all QS replicates for that branch, and the “alt n”  
1196 axes identifying the frequencies of the two alternative (conflicting) topologies.

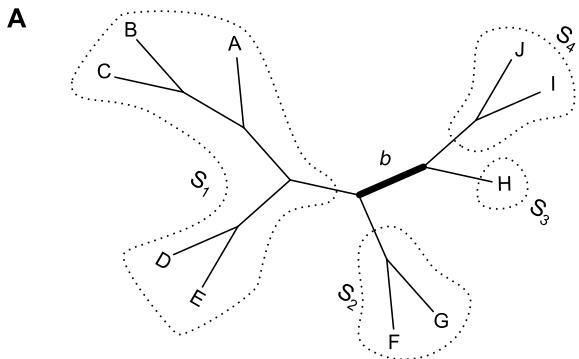

Replicate 1

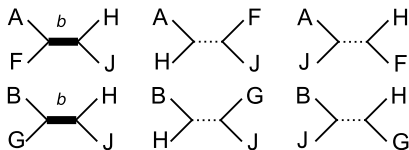

Replicate 2

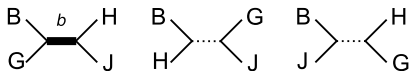

...

Concordant quartet topology    Discordant topology #1    Discordant topology #2

**B** Quartet Sampling Internal Node Scores = **0.52** / **0.04** / **0.01**

**Quartet Concordance (QC)**

How often is the concordant quartet inferred over both discordant quartets?

QC=1 → all concordant  
QC=0 → equivocal conc./disc.  
QC<0 → disc. > concordant

**Quartet Differential (QD)**

Are discordant #1 and #2 frequencies equal or skewed?

QD=0 → all concordant  
QD=0.3 → skewed  
QD=1 → all #1 or #2

**Quartet Uncertainty (QU)**

What proportion of replicates were uninformative? (failed likelihood differential cutoff)

Examples:

QU=0 → no uninformative  
QU=0.3 → 30% uninform.  
QU=1 → none informative

Quartet Sampling Terminal Node Scores = **(0.52)**

**Quartet Fidelity (QF)**

When this taxon is sampled, how often does it produce a concordant topology?

Examples:

QF=1 → all concordant  
QF=0.1 → 10% concordant  
QF=0 → none concordant

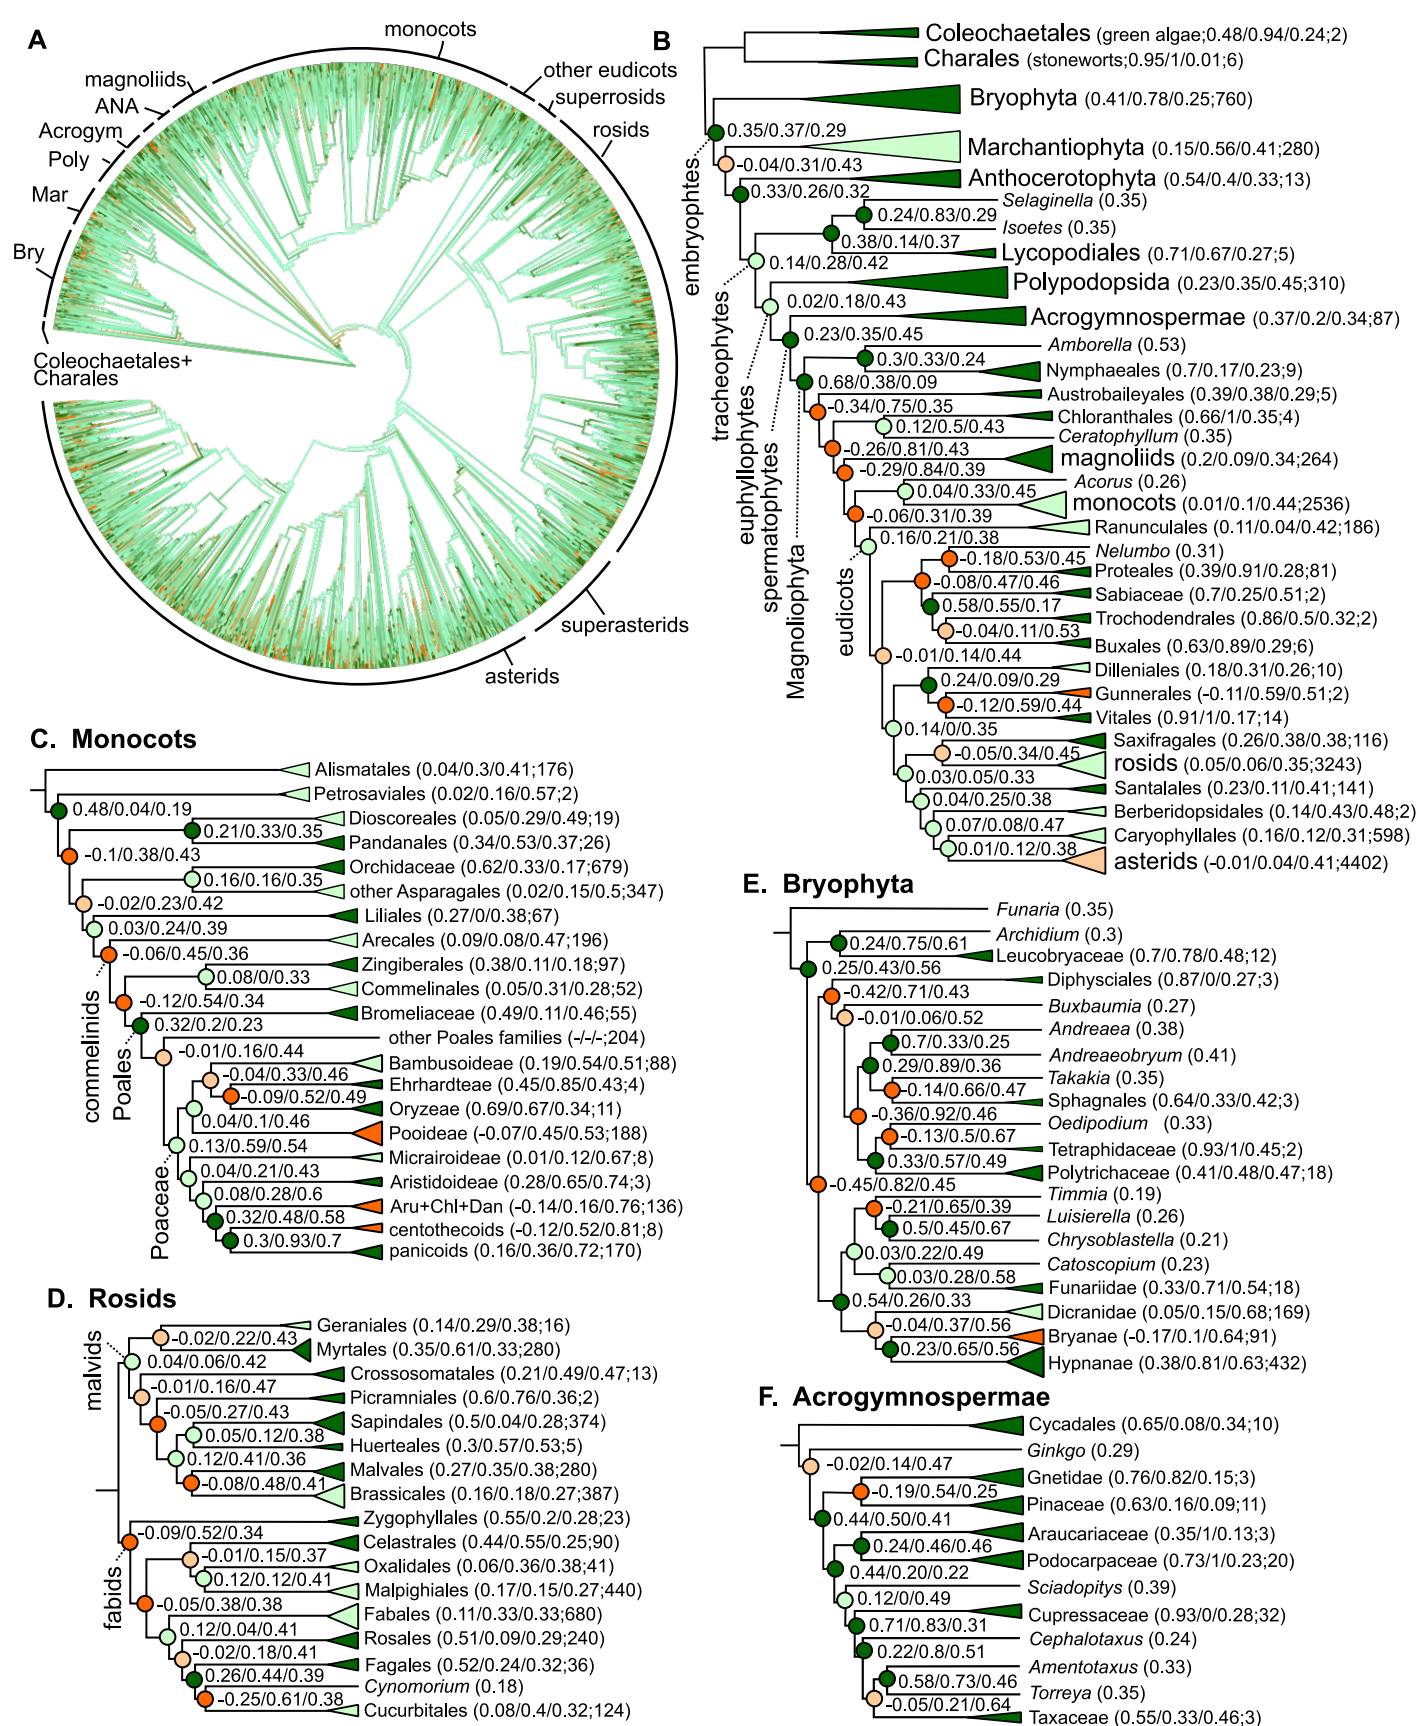

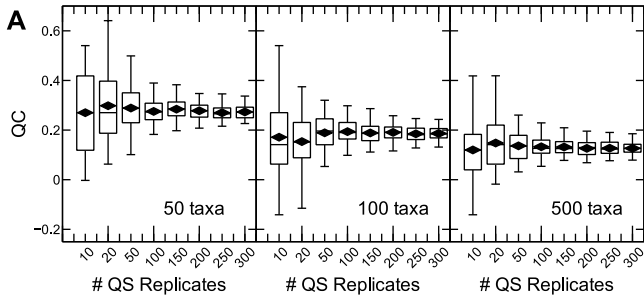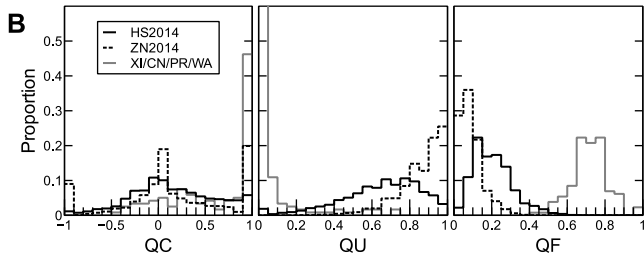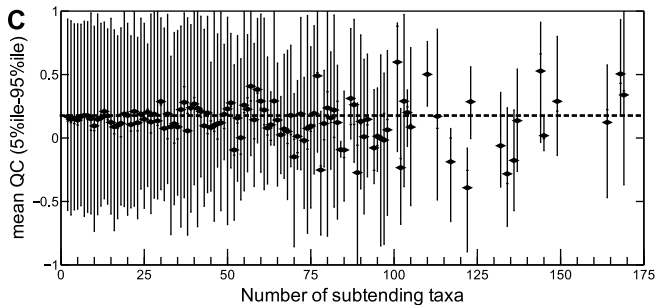

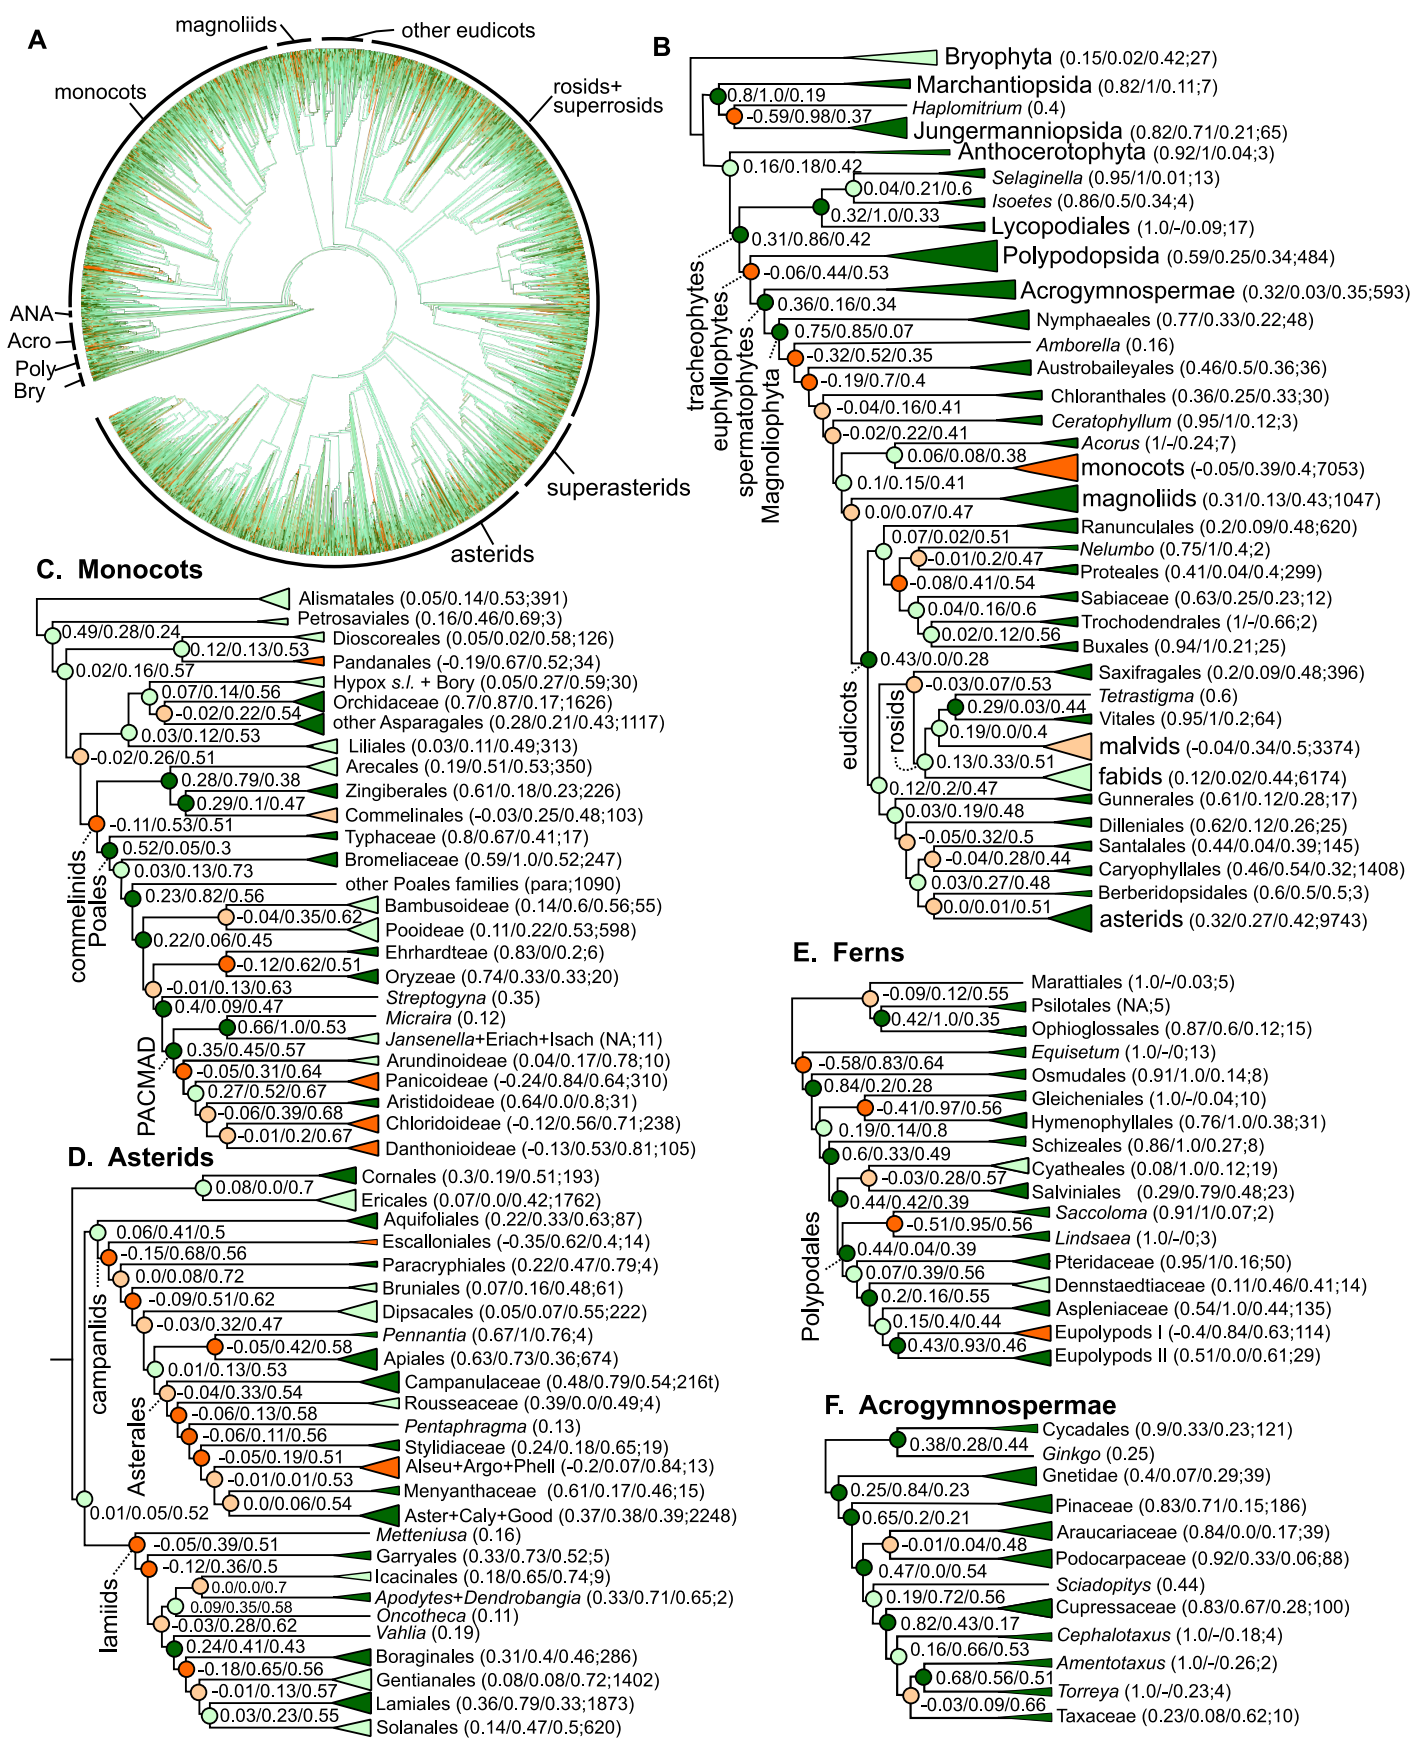



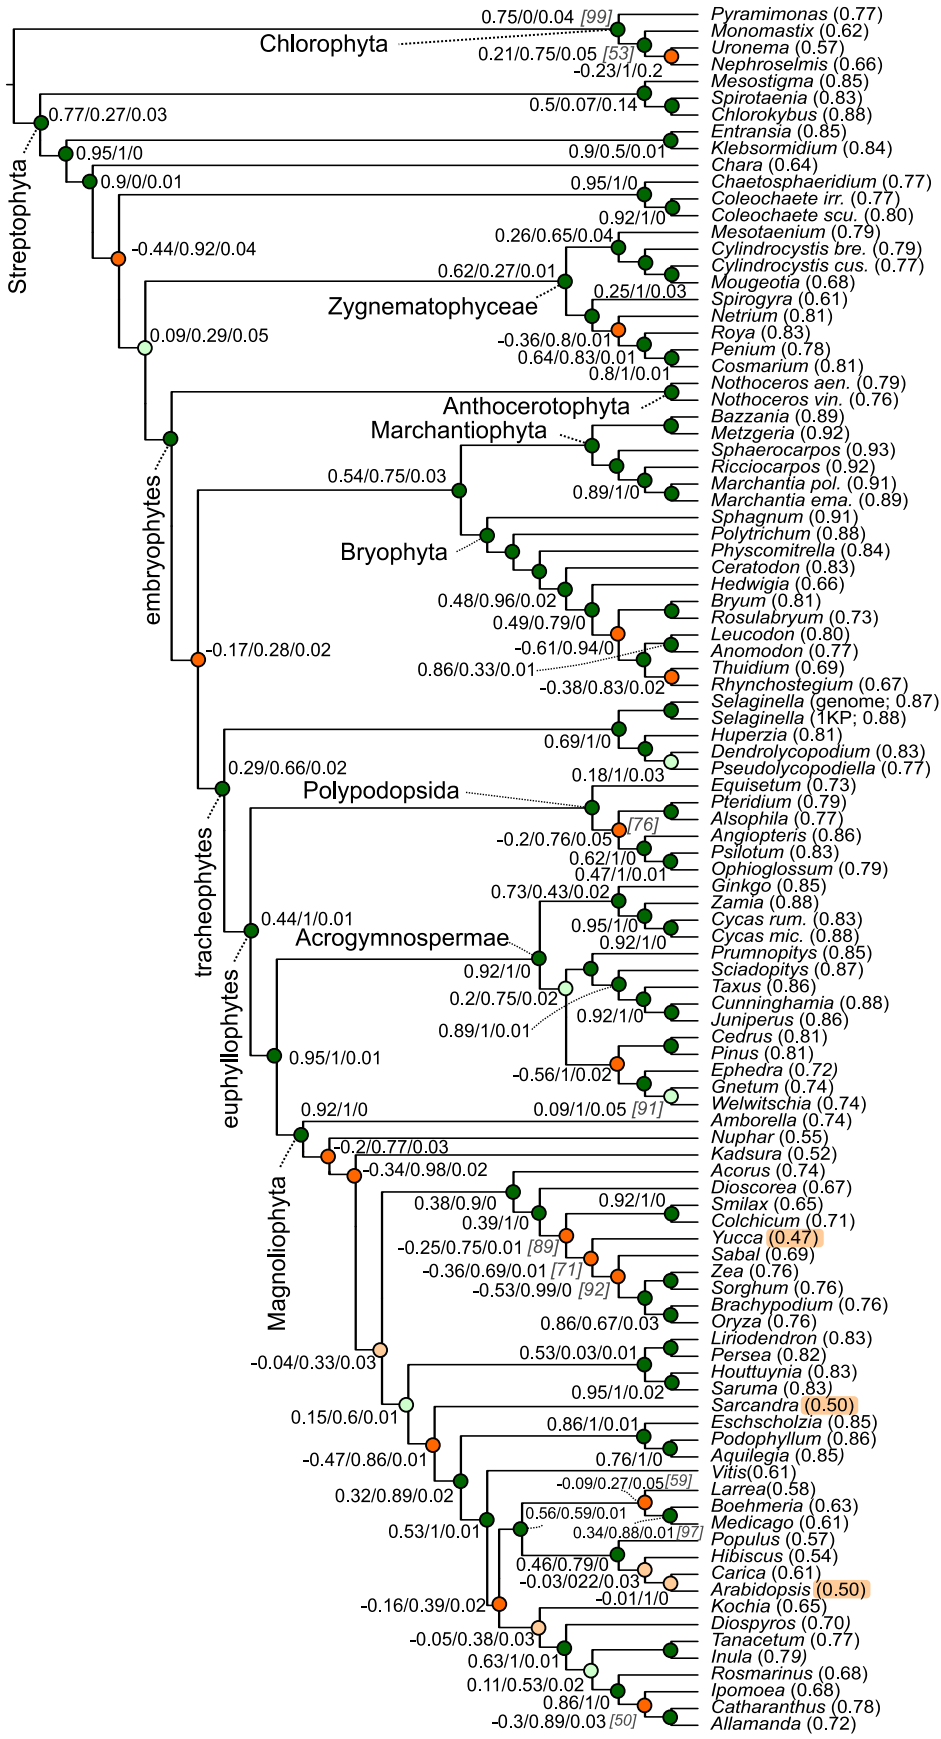

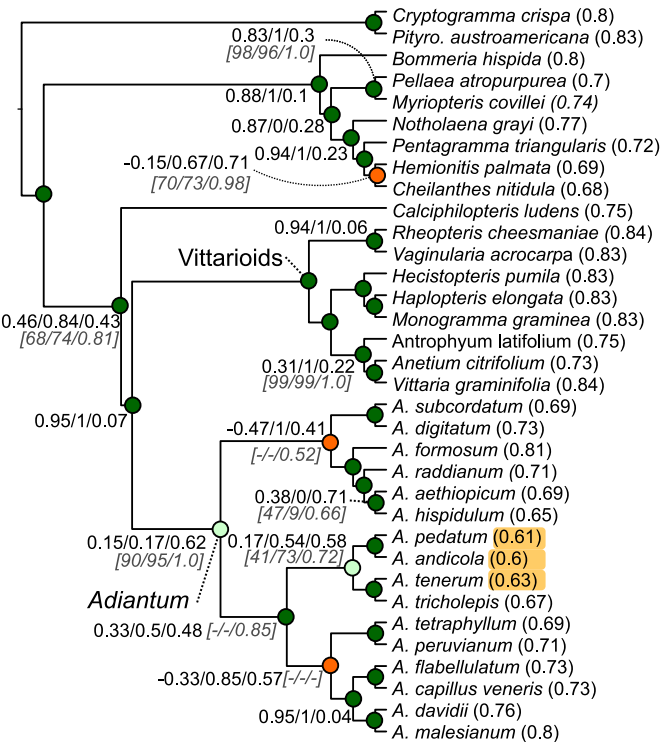



## A. Non-vascular plants

HS2014

WI2014

ZN2014

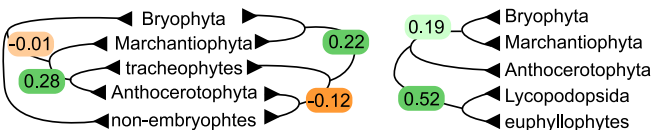

## B. *Ginkgo* + cycads

ZN2014

WI2014

HS2014

ZN2014

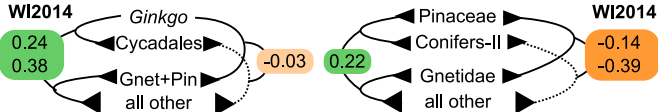

## C. Gnetidae + conifers

## D. "ANA grade" angiosperms

HS2014 ("Ambo+Nym-first")

WI2014 ("Amborella-first")

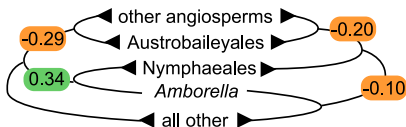

ZN2014 ("Nymphaeales first")

XI2014 ("Ambo+Nym-first")

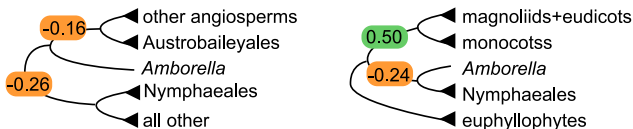

## E. Magnoliids, monocots, and eudicots

WI2014

ZN2014

XI2014

HS2014

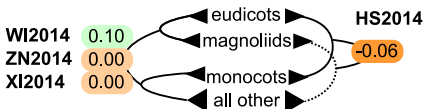

## A. *Solanum* sect. *Lycopersicon*

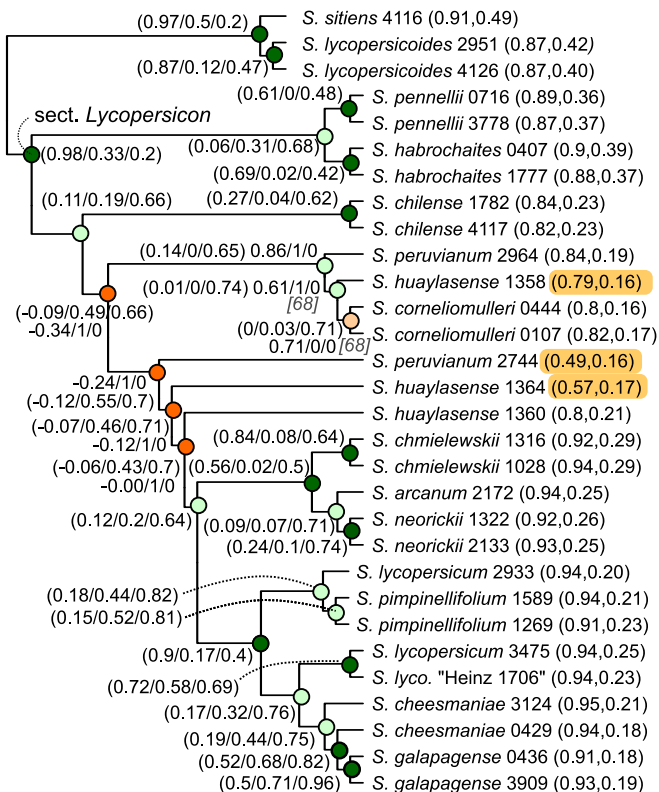

## B. Caryophyllales

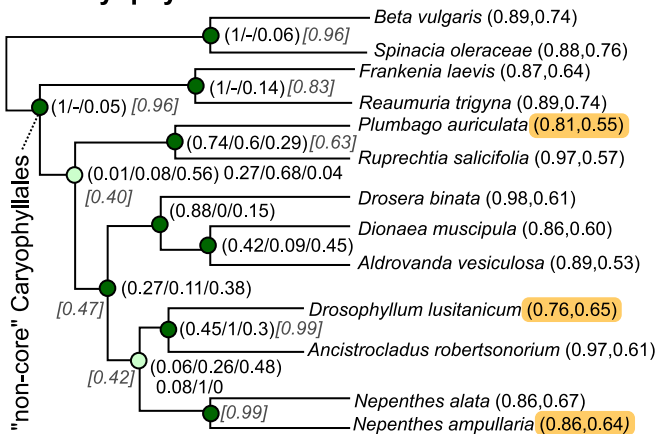

Source: http://www.biorxiv.org/content/10.1101/148536v1.full.pdf
